# Supplementary material for: Protocol for a phase III, non-inferiority, randomised comparison of a new fibrinogen concentrate versus cryoprecipitate for treating acquired hypofibrinogenaemia in bleeding cardiac surgical patients: the FIBRES trial
Source: PubMed Central journal article supplement — BMJ Open. 2018 Apr 20;8(4):e020741. doi: 10.1136/bmjopen-2017-020741 (PMC5914770; doi:10.1136/bmjopen-2017-020741), 2018-04-20
Supplement: bmjopen-2017-020741.draft_revisions.pdf [file bmjopen-2017-020741.draft_revisions.pdf]

# BMJ Open

BMJ Open is committed to open peer review. As part of this commitment we make the peer review history of every article we publish publicly available.

When an article is published we post the peer reviewers' comments and the authors' responses online. We also post the versions of the paper that were used during peer review. These are the versions that the peer review comments apply to.

The versions of the paper that follow are the versions that were submitted during the peer review process. They are not the versions of record or the final published versions. They should not be cited or distributed as the published version of this manuscript.

BMJ Open is an open access journal and the full, final, typeset and author-corrected version of record of the manuscript is available on our site with no access controls, subscription charges or pay-per-view fees (<http://bmjopen.bmj.com>).

If you have any questions on BMJ Open's open peer review process please email [info.bmjopen@bmj.com](mailto:info.bmjopen@bmj.com)

# BMJ Open

## Protocol for a phase 3, non-inferiority, randomized comparison of a new fibrinogen concentrate vs. cryoprecipitate for treating acquired hypofibrinogenemia in bleeding cardiac surgical patients: the FIBRES trial

|                                 |                                                                                                                                                                                                                                                                                                                                                                                                                   |
|---------------------------------|-------------------------------------------------------------------------------------------------------------------------------------------------------------------------------------------------------------------------------------------------------------------------------------------------------------------------------------------------------------------------------------------------------------------|
| Journal:                        | <i>BMJ Open</i>                                                                                                                                                                                                                                                                                                                                                                                                   |
| Manuscript ID                   | bmjopen-2017-020741                                                                                                                                                                                                                                                                                                                                                                                               |
| Article Type:                   | Protocol                                                                                                                                                                                                                                                                                                                                                                                                          |
| Date Submitted by the Author:   | 21-Nov-2017                                                                                                                                                                                                                                                                                                                                                                                                       |
| Complete List of Authors:       | Karkouti, K; University of Toronto, Anesthesia<br>Callum, Jeannie; Sunnybrook Health Sciences Centre, Clinical Pathology<br>Rao, Vivek; University of Toronto, Surgery<br>heddle, nancy; mcmaster university, faculty of health sciences<br>Farkouh, Michael; University of Toronto, Medicine<br>Crowther, Mark; McMaster University, Canada<br>Scales, Damon; University of Toronto, Department of Critical Care |
| <b>Primary Subject Heading</b>: | Haematology (incl blood transfusion)                                                                                                                                                                                                                                                                                                                                                                              |
| Secondary Subject Heading:      | Cardiovascular medicine                                                                                                                                                                                                                                                                                                                                                                                           |
| Keywords:                       | Bleeding disorders & coagulopathies < HAEMATOLOGY, Cardiac surgery < SURGERY, Clinical trials < THERAPEUTICS, Blood bank & transfusion medicine < HAEMATOLOGY, HAEMATOLOGY                                                                                                                                                                                                                                        |
|                                 |                                                                                                                                                                                                                                                                                                                                                                                                                   |

SCHOLARONE™  
Manuscripts

1  
2  
3 **Protocol for a phase 3, non-inferiority, randomized comparison of a new**  
4 **fibrinogen concentrate vs. cryoprecipitate for treating acquired**  
5 **hypofibrinogenemia in bleeding cardiac surgical patients: the FIBRES trial**  
6  
7

8 Keyvan Karkouti,<sup>1</sup> Jeannie Callum,<sup>2</sup> Vivek Rao,<sup>3</sup> Nancy Heddle,<sup>4</sup> Michael E Farkouh,<sup>5</sup>  
9 Mark Crowther,<sup>6</sup> Damon C Scales<sup>7</sup>  
10  
11

12 <sup>1</sup> Department of Anesthesia; Faculty of Health Policy, Management, and Evaluation; Peter  
13 Munk Cardiac Centre, and Toronto General Hospital Research Institute, Toronto General  
14 Hospital, University Health Network, University of Toronto, Toronto, Ontario, Canada  
15

16 <sup>2</sup> Department of Clinical Pathology, Sunnybrook Health Sciences Centre; Department of  
17 Laboratory Medicine and Pathobiology, University of Toronto, Ontario, Canada  
18

19 <sup>3</sup> Division of Cardiovascular Surgery, Peter Munk Cardiac Centre and Toronto General  
20 Hospital Research Institute, Toronto General Hospital, University Health Network, University  
21 of Toronto, Toronto, Ontario, Canada  
22

23 <sup>4</sup> Department of Medicine, Faculty of Health Sciences, McMaster University, Hamilton,  
24 Ontario, Canada  
25

26 <sup>5</sup> Peter Munk Cardiac Centre and Heart and Stroke Richard Lewar Centre, University of  
27 Toronto, Toronto, Ontario, Canada  
28

29 <sup>6</sup> Department of Pathology and Molecular Medicine, McMaster University, Hamilton, Ontario,  
30 Canada  
31

32 <sup>7</sup> Department of Critical Care Medicine, Sunnybrook Health Sciences Centre;  
33 Interdepartmental Division of Critical Care and Department of Medicine, University of Toronto,  
34 Toronto, Ontario, Canada  
35  
36

37 **Corresponding author:**

38 Professor Keyvan Karkouti, Department of Anesthesia, Toronto General Hospital, 200  
39 Elizabeth Street, 3EN-464, Toronto, Ontario, Canada

40 Tel: (416) 340 8597

41 Fax: (416) 340 3698

42 Email: [keyvan.karkouti@uhn.ca](mailto:keyvan.karkouti@uhn.ca)  
43  
44  
45

46 **Word count:** 3,410  
47  
48

49 **Keywords:** Bleeding disorders and coagulopathies; Cardiac surgery; Clinical trials; Adult  
50 surgery; Blood bank & transfusion medicine; Haematology  
51  
52  
53  
54  
55  
56  
57

## ABSTRACT

**Introduction:** Coagulopathic bleeding is a serious complication of cardiac surgery to which an important contributor is acquired hypofibrinogenemia (plasma fibrinogen <1.5–2.0 g/L). The standard intervention for acquired hypofibrinogenemia is cryoprecipitate, but purified fibrinogen concentrates are also available. There is little comparative data between the two therapies and randomized trials are needed.

**Methods and analysis:** FIBrinogen REplenishment in Surgery (FIBRES) is a multi-centre, randomized (1:1), active-control, single-blinded, phase 3 trial in adult cardiac surgical patients experiencing clinically significant bleeding related to acquired hypofibrinogenemia. The primary objective is to demonstrate that fibrinogen concentrate (Octafibrin/Fibryga, Octapharma) is non-inferior to cryoprecipitate. All patients for whom fibrinogen supplementation is ordered by the clinical team within 24 hours of cardiopulmonary bypass will receive 4 g fibrinogen concentrate or 10 units of cryoprecipitate (dose-equivalent to 4 g), based on random allocation and deferred consent. The primary outcome is total red cell, platelet, and plasma transfusions administered within 24 hours of bypass. Secondary outcomes include major bleeding, fibrinogen levels, and adverse events within 28 days. Enrollment of 1,200 patients will provide >90% power to demonstrate non-inferiority. A pre-planned interim analysis will include 600 patients. The pragmatic design and treatment algorithm align with standard practice, aiding adherence and generalizability.

**Ethics and dissemination:** The study is approved by the local research ethics board and will be conducted in accordance with the Declaration of Helsinki, Good Clinical Practice guidelines, and regulatory requirements. Patient consent prior to treatment is waived, as per criteria in the Tri-Council Policy Statement. Results will be published in the scientific/medical literature, and at international congresses. Non-inferiority of purified fibrinogen concentrate would support its use in acquired hypofibrinogenemia. The results are likely to improve care for cardiac surgical patients experiencing significant bleeding, an under-studied yet high-risk population.

**Trial registration:** NCT03037424 (ClinicalTrials.gov).

**Word count:** 294 (max. 300 words)

## STRENGTHS AND LIMITATIONS OF THIS STUDY

*[Up to 5 bullets, no longer than one sentence each, each relating to the methods]*

- This is the largest randomized comparison of fibrinogen concentrate versus cryoprecipitate in adult patients with acquired hypofibrinogenemia due to cardiac surgery involving cardiopulmonary bypass.
- Simple, pragmatic study design and use of a treatment algorithm that aligns with standard clinical practice will enhance adherence and ensure clinical relevance and generalizability.
- Use of an active control, cryoprecipitate, as the comparator guarantees that all patients in the study will receive fibrinogen supplementation as clinically indicated.
- The large sample size of approximately 1,200 patients in this high-risk population will provide >90% power to detect non-inferiority of fibrinogen concentrate to cryoprecipitate.
- It will not be possible to fully blind clinicians to treatment allocation, so all outcome assessors will be blinded to minimize the risk of bias.

## INTRODUCTION

Coagulopathy leading to excessive bleeding is a serious complication of cardiac surgery requiring cardiopulmonary bypass (CPB). Occurring in approximately 10% or more of cases, it often requires massive blood transfusion with allogeneic blood products (ABPs), and is associated with an increased risk of serious postoperative adverse outcomes, including sepsis, renal failure, and death.[1-4] While the causes of coagulopathy in this setting are likely to be multifactorial, acquired hypofibrinogenemia, considered as a deficiency in plasma fibrinogen levels below 1.5–2.0 g/L,[5] is believed to be one of the primary factors.[6]

Fibrinogen is the most abundant clotting factor in the human circulation and plays a pivotal role in hemostasis and the coagulation cascade by promoting clot formation and platelet aggregation.[7] Physiological levels of fibrinogen are typically in the range of 1.5–4.5 g/L,[8] with a half-life following synthesis of approximately four days.[9] A number of factors may contribute to the development of acquired hypofibrinogenemia in cardiac surgery. Fibrinogen loss may result from acute bleeding, dilution of the circulatory volume due to administration of fluids and priming of the CPB circuit, and consumption due to activation of the coagulation cascade during CPB.[10] Since fibrinogen has only a limited reserve in the body, a modest decrease in levels to <1.5–2.0 g/L impairs coagulation and increases the likelihood of bleeding complications.[10-14] Fibrinogen levels have been shown to fall 40–50% during cardiac surgery,[10] with a critical drop observed in approximately 5% of patients.[15] In these patients, fibrinogen supplementation is believed to be essential and is the current standard of care in most jurisdictions.[6,16]

While supplementation of fibrinogen has historically included the use of fresh frozen plasma, the two principal options currently recommended for supplementation in acquired hypofibrinogenemia are cryoprecipitate and purified fibrinogen concentrate.[5] Cryoprecipitate is currently used in North America and is an ABP prepared from fresh frozen plasma through a process of thawing and centrifugation. The clotting factor-enriched precipitate is resuspended in a small volume of plasma and refrozen. Typical fibrinogen content is around 15 g/L,[17] although this may vary considerably (3–30 g/L) due to inter-donor variability.[18] Cryoprecipitate has largely been withdrawn from most European countries due to safety concerns because it does not undergo pathogen reduction,[19] where treatment with purified human fibrinogen concentrate is the preferred therapeutic choice for hypofibrinogenemia. Fibrinogen concentrate has a number of important advantages over cryoprecipitate, including: significantly higher purity; standardized fibrinogen content, enabling more accurate dosing; faster preparation and administration time; no requirement for blood type matching; and improved safety, particularly through pathogen reduction technology.[6,19-21] Cryoprecipitate remains the most common fibrinogen replacement product in North America and may be a more effective hemostatic agent because it also contains hemostatic factors VIII and XIII, von Willebrand factor, and platelet microparticles.

1  
2  
3  
4 There is scant data comparing cryoprecipitate and fibrinogen concentrate for the treatment of  
5 acquired hypofibrinogenemia; thus, we do not know which of these is the most appropriate  
6 therapy in bleeding cardiac surgical patients. Moreover, mounting evidence indicates that  
7 hemostatic management of patients with coagulopathic bleeding is evolving from the  
8 conventional use of non-purified ABPs to targeted therapeutic algorithms using purified  
9 coagulation factor concentrates such as fibrinogen concentrate.[22] There is therefore a need  
10 for prospective, randomized clinical trials designed to specifically evaluate cryoprecipitate and  
11 fibrinogen concentrate in parallel as part of hemostatic treatment algorithms in bleeding  
12 cardiac surgical patients.  
13  
14  
15  
16

17  
18 Our study design addresses these issues by assessing non-inferiority of a purified fibrinogen  
19 concentrate against cryoprecipitate for the treatment of acquired hypofibrinogenemia in  
20 cardiac surgery. Given the theoretical and logistical advantages of fibrinogen concentrate  
21 relative to cryoprecipitate outlined above, illustrating that fibrinogen concentrate is non-inferior  
22 to cryoprecipitate would support the use of this purified fibrinogen concentrate for hemostatic  
23 management in this high-risk, clinically important setting. Importantly, the conduct of  
24 randomized trials in bleeding surgical patients poses specific challenges, and this trial  
25 incorporates several design features to address these challenges.  
26  
27  
28  
29

## 30 **METHODS AND ANALYSIS**

### 31 **Objective**

32 The primary objective of this study is to demonstrate that the administration of the fibrinogen  
33 concentrate Octafibrin/Fibryga (Octapharma AG, Lachen, Switzerland; currently approved in  
34 Canada for the treatment of congenital afibrinogenemia and hypofibrinogenemia) is non-  
35 inferior to cryoprecipitate for treating bleeding in cardiac surgical patients in whom fibrinogen  
36 supplementation is ordered in accordance with accepted clinical standards.  
37  
38  
39  
40

### 41 **Study design and setting**

42 The FIBrinoGen REplenishment in Surgery (FIBRES) trial is a pragmatic, multi-centre,  
43 randomized, active-control, non-inferiority phase 3 trial in adult cardiac surgical patients  
44 experiencing clinically significant bleeding in whom fibrinogen supplementation is deemed to  
45 be necessary. A pragmatic study design was chosen because it allows participating sites and  
46 surgical teams to maintain standard clinical practice when treating patients, making the study  
47 clinically relevant and generalizable to the large population of patients undergoing cardiac  
48 surgery, and increases the likelihood of protocol adherence and successful study completion.  
49 Approximately 1,200 patients will be recruited from up to 12 Canadian hospitals. Patients will  
50 be randomized when fibrinogen supplementation is ordered to either of two treatment groups:  
51 fibrinogen concentrate 4 g (intervention) or cryoprecipitate 10 units (active control). No  
52 placebo arm has been included in the trial because withholding effective treatment is neither  
53  
54  
55  
56  
57  
58  
59  
60

1  
2  
3 consistent with standard practice nor acceptable on ethical grounds. Treatment arm allocation  
4 will be maintained for up to 24 hours after completion of CPB surgery; only the randomly-  
5 allocated fibrinogen replacement product can be provided during this time. No other aspects  
6 of care will be modified. Informed consent will be obtained as soon as possible after surgery.  
7 Efficacy and safety will be evaluated. An overview of the study design is presented in **Figure**  
8 **1**. The study commenced in February 2017 and is expected to complete in late 2018, with  
9 results available in early 2019.  
10  
11

### 12 13 **Eligibility criteria**

14  
15 The study will enroll all adult patients undergoing cardiac surgery with CPB for whom  
16 fibrinogen supplementation is ordered in accordance with accepted clinical guideline-driven  
17 standards (significant hemorrhage and known or presumed acquired hypofibrinogenemia).  
18 The exclusion criteria are: receipt of either fibrinogen concentrate or cryoprecipitate within 24  
19 hours before surgery; a history of severe allergic reaction to fibrinogen concentrate or  
20 cryoprecipitate; known refusal of either study treatment (*i.e.*, for religious reasons); a known  
21 fibrinogen level >3.0 g/L within 30 minutes of the order for treatment (to eliminate the risk of  
22 raising a patient's fibrinogen level above the upper limit of the normal range [4.0 g/L]); and  
23 known pregnancy.  
24  
25  
26  
27

### 28 29 **Interventions**

#### 30 **Intervention**

31 Patients randomized to the intervention group will receive fibrinogen concentrate  
32 administered by slow (over 10 minutes) intravenous injection immediately after reconstitution  
33 with 50 mL of sterile water for injection, as per the manufacturer's instructions. Patients  
34 randomized to this group will receive 4 g of fibrinogen concentrate each time fibrinogen  
35 supplementation is ordered during the first 24 hours after termination of CPB surgery.  
36  
37  
38

#### 39 **Active control**

40  
41 Those patients randomized to the active control group will each receive cryoprecipitate, given  
42 as 10 units (dose-equivalent to 4 g, as per internal Canadian Blood Services quality control  
43 data; personal communication, Canadian Blood Services) each time fibrinogen  
44 supplementation is ordered during the first 24 hours after termination of CPB. Cryoprecipitate  
45 will be prepared according to current Health Canada standards and administered by  
46 intravenous infusion following hospital transfusion policies at each of the participating study  
47 sites.  
48  
49  
50

51  
52 In both study arms, study treatment (fibrinogen concentrate or cryoprecipitate) may be  
53 administered prior to the determination of fibrinogen levels in a patient that is bleeding if  
54 deemed appropriate as per current clinical standards (*i.e.*, rapid bleeding precluding waiting  
55 for laboratory results). If fibrinogen supplementation is needed after the 24-hour study period  
56  
57



1  
2  
3 is over, patients will receive cryoprecipitate, which is the current standard-of-care in most of  
4 Canada. Concomitant medications to treat bleeding that are part of standard patient care will  
5 be permitted throughout the study, but must be recorded in the case report form (CRF).  
6  
7

### 8 **Outcomes and study duration**

9  
10 The primary outcome of the study is one of efficacy; specifically, comparison between study  
11 groups of the total number of red cells, platelets, and plasma administered during the first 24  
12 hours after termination of CPB surgery.  
13

14  
15 Secondary outcomes of the study will include both efficacy and safety outcomes. For the  
16 former, the secondary outcomes are: 1) comparison of the total number of ABPs (not  
17 including cryoprecipitate) administered from the start of surgery up to seven days after  
18 surgery (or discharge if earlier); 2) comparison of major bleeding (using the modified universal  
19 definition of perioperative bleeding [UDPB] in cardiac surgery)[23] during the first 24 hours  
20 after termination of CPB; and 3) comparison of the effect of treatment on plasma fibrinogen  
21 levels, determined by the change from within one hour before to one hour after the first dose  
22 of fibrinogen supplementation. The secondary safety outcomes are: 1) adverse events (AEs)  
23 and serious AEs (SAEs) up to 28 days postoperatively; 2) a composite AE grouping (death,  
24 myocardial infarction, stroke, acute liver injury, acute kidney injury, and thromboembolic  
25 events) up to 28 days postoperatively; and 3) the duration of mechanical ventilation, the  
26 length of intensive care unit (ICU) admission, and total duration of hospitalization, all  
27 censored at 28 days postoperatively.  
28  
29  
30  
31  
32  
33

34 The duration of the treatment period is 24 hours (from termination of CPB), and the duration  
35 of the study for each individual patient is 28 days.  
36  
37

### 38 **Sample size**

39  
40 The sample size for this study was calculated based on the primary objective of  
41 demonstrating efficacy non-inferiority of the intervention (fibrinogen concentrate) relative to an  
42 active control (cryoprecipitate), with respect to the primary outcome. Determination of non-  
43 inferiority is based on a type I error probability of  $\alpha = 0.025$  and a clinical non-inferiority  
44 margin of  $\delta = 0.20$  around the mean units transfused. The choice of non-inferiority margin  
45 was largely motivated by the large degree of variation in utilization of blood products that is to  
46 be expected from previous studies reflecting current clinical practice, and clinical relevance in  
47 this setting.[24]  
48  
49  
50

51  
52 An empirical distribution function with a mean of 16 units and standard deviation of 14 units  
53 was calculated based on data from a previous study by Karkouti *et al.*[24] This was used to  
54 estimate study power by performing 10,000 simulations for each of the different possible  
55 sample sizes. Using this approach, we calculated an empirical power >90% with a sample  
56  
57

1  
2  
3 size  $\geq 550$  patients in each treatment group. Therefore, and assuming a 10% drop-out rate  
4 (patients randomized but not treated, or lost to-follow-up) for the study based on the use of  
5 two treatments that are within the standard-of-care for CPB surgery, the planned total sample  
6 size is 1,200 patients (600 per treatment group).  
7

### 8 9 **Randomization and blinding**

10 The randomization schedule will be prepared by an independent biostatistician not involved in  
11 the conduct of the study using a permuted-block, random allocation schedule (stratified by  
12 study site). The random allocation schedule will be provided to participating centres in  
13 opaque, consecutively numbered envelopes and neither healthcare providers nor individuals  
14 responsible for randomizing patients will be aware of the treatment allocation at the time  
15 fibrinogen supplementation is ordered.  
16  
17  
18

19  
20 Patients will be randomized in a ratio of 1:1 to either the intervention (fibrinogen concentrate)  
21 group or the active control (cryoprecipitate) by the blood bank technologist once the order for  
22 fibrinogen supplementation is received and inclusion/exclusion criteria are confirmed. The  
23 requirement for informed consent prior to randomization will be waived (see Ethics section).  
24 Patients and outcome assessors will be blinded to treatment allocation throughout the study;  
25 clinicians will remain blinded only up to the point of use since the study products have distinct  
26 physical appearances and maintaining blinding is not logistically possible.  
27  
28  
29

### 30 31 **Data analysis plan**

#### 32 **Data collection and management**

33 Data collection will occur following randomization and procurement of consent (see Ethics  
34 section). Full details of the data to be collected during the study, together with the timing and  
35 frequency of data collection, are provided in **Table 1**.  
36  
37  
38  
39  
40  
41  
42  
43  
44  
45  
46  
47  
48  
49  
50  
51  
52  
53  
54  
55  
56  
57  
58  
59  
60

1  
2  
3  
4  
5  
6  
7  
8  
9  
10  
11  
12  
13  
14  
15  
16  
17  
18  
19  
20  
21  
22  
23  
24  
25  
26  
27  
28  
29  
30  
31  
32  
33  
34  
35  
36  
37  
38  
39  
40  
41  
42  
43  
44  
45  
46  
47

**Table 1.** Flow chart of study procedures and assessments performed at each study visit.

| <b>Procedures</b>                                       | <b>Prior to Enrollment</b> | <b>Visit 1</b><br>Post-randomization<br>(0–24 h) | <b>Visit 1a</b><br>0–36 h<br>Any additional IMP | <b>Visit 2</b><br>POD7/DC | <b>Visit 3</b><br>POD28 |
|---------------------------------------------------------|----------------------------|--------------------------------------------------|-------------------------------------------------|---------------------------|-------------------------|
| <b>Blood bank receives fibrinogen order<sup>a</sup></b> | <b>X</b>                   | <b>(X)<sup>e</sup></b>                           |                                                 |                           |                         |
| <b>Inclusion and exclusion criteria</b>                 | <b>X</b>                   |                                                  |                                                 |                           |                         |
| <b>Randomization</b>                                    | <b>X</b>                   |                                                  |                                                 |                           |                         |
| <b>IMP administration<sup>b</sup></b>                   |                            | <b>X</b>                                         |                                                 |                           |                         |
| <b>Confirm integrated consent</b>                       | <b>X</b>                   |                                                  |                                                 |                           |                         |
| <b>Obtain delayed consent</b>                           |                            | <b>X</b>                                         | <b>(X)</b>                                      | <b>(X)</b>                |                         |
| <b>Baseline data</b>                                    |                            |                                                  |                                                 |                           |                         |
| Demographics                                            |                            | <b>X</b>                                         |                                                 |                           |                         |
| Medical history                                         |                            | <b>X</b>                                         |                                                 |                           |                         |
| Preoperative medications                                |                            | <b>X</b>                                         |                                                 |                           |                         |
| <b>Surgical data</b>                                    |                            |                                                  |                                                 |                           |                         |
| Intraoperative medications                              |                            | <b>X</b>                                         |                                                 |                           |                         |
| CPB time                                                |                            | <b>X</b>                                         |                                                 |                           |                         |
| Cross-clamp time                                        |                            | <b>X</b>                                         |                                                 |                           |                         |
| Circulatory arrest                                      |                            | <b>X</b>                                         |                                                 |                           |                         |
| Vital signs                                             |                            | <b>X</b>                                         |                                                 |                           |                         |
| Fluid in- and output monitoring                         |                            | <b>X</b>                                         |                                                 |                           |                         |
| Inotropes and vasopressors                              |                            | <b>X</b>                                         | <b>X</b>                                        |                           |                         |

| Procedures                                  | Prior to Enrollment | Visit 1<br>Post-randomization<br>(0–24 h) | Visit 1a<br>0–36 h<br>Any additional IMP | Visit 2<br>POD7/DC | Visit 3<br>POD28 |
|---------------------------------------------|---------------------|-------------------------------------------|------------------------------------------|--------------------|------------------|
| <b>Laboratory assessments</b>               |                     |                                           |                                          |                    |                  |
| Chemistry <sup>c</sup>                      |                     | X                                         | X                                        | X                  |                  |
| Hematology <sup>c</sup>                     |                     | X <sup>f</sup>                            | X                                        | X                  |                  |
| Coagulation profile <sup>c</sup>            |                     | X <sup>f</sup>                            | X                                        | X                  |                  |
| Safety labs <sup>c</sup>                    |                     | X                                         | X                                        | X                  |                  |
| <b>Transfusion requirements<sup>d</sup></b> |                     |                                           |                                          |                    |                  |
| RBCs                                        |                     | X                                         | X                                        | X                  |                  |
| Pooled and apheresis platelets              |                     | X                                         | X                                        | X                  |                  |
| Plasma                                      |                     | X                                         | X                                        | X                  |                  |
| Other hemostatic products                   |                     | X                                         | X                                        | X                  |                  |
| <b>Blood loss determination using UDPB</b>  |                     | X                                         | X                                        | X                  |                  |
| <b>Extubation time</b>                      |                     | X                                         | (X)                                      | (X)                | (X)              |
| <b>ICU length of stay</b>                   |                     | X                                         | (X)                                      | (X)                | (X)              |
| <b>Hospital length of stay</b>              |                     |                                           |                                          | X                  | (X)              |
| <b>AEs and SAEs</b>                         |                     | X                                         | X                                        | X                  | X                |
| <b>Concomitant medications</b>              |                     | X                                         | X                                        | X                  | X                |
| <b>Physical examination</b>                 |                     | X                                         | X                                        |                    |                  |

<sup>a</sup> After the start of surgery and during or after CPB

1  
2  
3  
4  
5  
6 <sup>b</sup> IMP will first be administered after the start of surgery based on the physician's judgment. The first IMP dose can be administered before fibrinogen levels  
7 are known in bleeding patients, but all subsequent doses must have confirmation of low fibrinogen level (<1.5–2.0 g/L by the Clauss method in addition to  
8 equivalent point-of-care alternatives, e.g., ROTEM<sup>®</sup> assay FIBTEM A10 of <12 mm, if available).

9  
10 <sup>c</sup> As per standard practice.

11  
12 <sup>d</sup> 24 hours after IMP administration.

13  
14 <sup>e</sup> Patients will be treated according to their group allocation for any subsequent doses needed during the treatment period.

15  
16 <sup>f</sup> Prior to and 60 minutes after IMP administration.

( ) if needed.

17 *Abbreviations:* AE, adverse event; CPB, cardiopulmonary bypass; DC, discharge; ICU, intensive care unit; IMP, investigational medicinal product; POD,  
18 postoperative day; RBC, red blood cell; SAE, serious adverse event; UDPB, universal definition of perioperative bleeding.  
19  
20  
21  
22  
23  
24  
25  
26  
27  
28  
29  
30  
31  
32  
33  
34  
35  
36  
37  
38  
39  
40  
41  
42  
43  
44  
45  
46  
47

1  
2  
3 All source records and source data will be maintained by the site investigator and preserved  
4 as stipulated by the regulatory authorities. An Electronic Data Capture (EDC) system will be  
5 used to collect study data. All patient information and data will be maintained as confidential,  
6 and patients will only be identified using a sequential numbering system. The site investigator  
7 will maintain a confidential patient identification code list.  
8  
9

## 10 Statistical methods

11 In this randomized, active control, non-inferiority trial, statistical analysis of the primary  
12 efficacy outcome will be conducted according to modified intention-to-treat (ITT) principles.  
13 The ITT population will comprise all randomized eligible patients who receive at least one  
14 dose of the allocated treatment and provide informed consent (see Ethics section). A  
15 secondary analysis will also be performed for the per-protocol (PP) population, which  
16 excludes patients with major protocol deviations (for example, receiving the incorrect  
17 treatment, receiving <80% of the planned dose, or missing the primary efficacy assessment).  
18  
19  
20  
21  
22

23 To demonstrate that treatment with fibrinogen concentrate (intervention) is clinically non-  
24 inferior to cryoprecipitate (active control) with respect to the primary outcome, a two-sample,  
25 one-sided test of the hypotheses:  $H_0: \mu_F/\mu_C \geq (1 + \delta)$  (inferiority), and  $H_1: \mu_F/\mu_C < (1 + \delta)$   
26 (non-inferiority), will be conducted (where  $\mu_F$  and  $\mu_C$  denote the mean number of transfused  
27 units in the fibrinogen concentrate and cryoprecipitate treatment groups, respectively). This  
28 will be based on a Poisson regression model and performed using a type I error probability of  
29  $\alpha = 0.025$  and clinical non-inferiority margin of  $\delta = 0.20$  around the mean units transfused.  
30 Non-inferiority of fibrinogen concentrate will be concluded if the upper limit of the one-sided  
31 confidence interval (CI) for the ratio  $\mu_F/\mu_C$  is less than  $(1 + \delta)$ . Where non-inferiority is  
32 demonstrated, a test for clinical superiority of fibrinogen concentrate with respect to the  
33 number of ABPs transfused will be performed.  
34  
35  
36  
37  
38

39 We also plan to examine a number of exploratory secondary outcomes in the analysis of  
40 efficacy: the number of ABPs administered from beginning of surgery up to 7 days  
41 postoperatively and within 24 hours after CPB termination, stratified by ABP type, will be  
42 examined using point estimates with two-sided 95% CIs, and descriptive statistics; major  
43 bleeding type will be evaluated by frequency distributions; and change in fibrinogen levels  
44 within 60 minutes before and after intervention will be tested using the Wilcoxon rank-sum  
45 test, and the Hodges-Lehmann estimator of median differences with 95% CIs. Analyses for  
46 efficacy will also be performed in patient subgroups, classified based on urgency and  
47 complexity of surgery.  
48  
49  
50  
51  
52

53 Evaluation of safety outcomes, AEs, and SAEs will be conducted in the safety analysis  
54 population (SAF), comprising all patients who receive at least one dose of study drug and  
55 provide informed consent (see Ethics section). Analysis of AEs will focus on treatment  
56  
57  
58

1  
2  
3 emergent adverse events (TEAEs), defined as AEs that start or worsen after the start of  
4 treatment (intervention or active control group). This analysis will be based on calculating  
5 point estimates and two-sided 95% CIs, in addition to descriptive statistics.  
6  
7

8 A pre-planned interim analysis will be conducted after 600 patients have completed the study.  
9 This will take the form of an unblinded interim analysis using an adjusted type I error rate  
10 according to the O'Brien-Fleming method.[25] At this point, enrollment may be stopped if a  
11 positive outcome, *i.e.*, rejection of  $H_0$ , is demonstrated (efficacy stop), or if the predictive  
12 power to test non-inferiority is insufficient (futility stop) (**Figure 2**). The study will continue as  
13 planned if neither scenario is fulfilled at the interim analysis.  
14  
15

### 16 17 18 **Monitoring and quality control and assurance**

19 An Independent Data and Safety Monitoring Committee (IDSMC) will be established by the  
20 Sponsor to review study data after each (approximately) 100 patients have been randomized.  
21 A meeting will also be convened to specifically evaluate the outcome of the pre-planned  
22 interim analysis. Meetings of the committee may also be called at other times, as deemed  
23 necessary based on occurrence of serious adverse events or any logistical concerns. The  
24 results of each IDSMC meeting will be communicated to the Principal Investigator and study  
25 Sponsor within 15 days, or earlier in matters relating to ensuring patient safety and/or study  
26 integrity. The IDSMC will comprise a minimum of three voting members with collective  
27 expertise in the fields of statistics, perioperative medicine, and hematology, who will review  
28 accumulating data pertaining to efficacy, safety, outcomes, and other study aspects such as  
29 recruitment, compliance, data quality, and risk versus benefit. The IDSMC will provide  
30 recommendations regarding the continuation, modification, or termination of the study, as  
31 appropriate. The duties and responsibilities of the IDSMC will be defined in a written, study-  
32 specific charter. Ultimately, the role of the IDSMC will be to protect and serve study  
33 participants, and to assist and advise the Principal Investigator and study Sponsor in the  
34 overall conduct, interpretation, validity, integrity, and ongoing relevance of the study.  
35  
36  
37  
38  
39  
40  
41

42 For quality control and assurance purposes, periodic monitoring of all study-related source  
43 data/records, adherence to the approved study protocol, and the completeness and accuracy  
44 of CRFs will be undertaken by an appointed independent study monitor. Full and direct  
45 access to all source documents will be provided. All study-related material will also be made  
46 available to independent quality assurance auditors and regulatory inspectors, as required.  
47  
48  
49

### 50 51 52 **ETHICS AND DISSEMINATION**

53 The study will be conducted in accordance with the ethical principles defined by the  
54 Declaration of Helsinki, and in compliance with the approved study protocol, Good Clinical  
55 Practice (GCP) guidelines, and all appropriate regulatory requirements governing the study  
56  
57  
58  
59  
60

1  
2  
3 centres participating in the trial. The study, study protocol, and all other study documents  
4 have been approved by the local research ethics board (REB) and regulatory authority.  
5

6  
7 Due to the emergency nature of the clinical setting, *i.e.*, bleeding during or after surgery, all  
8 patients included in the study will be incapable of providing informed consent at the time  
9 treatment is required. Furthermore, delays brought about by obtaining surrogate consent can  
10 be severely detrimental to patient well-being. Moreover, this bleeding complication occurs  
11 infrequently (approximately 5% of cases) and cannot be reliably predicted before surgery, and  
12 a requirement to obtain prior consent from patients would make it impracticable to conduct  
13 the study. The study compares two fibrinogen replacement sources that are currently within  
14 the standard-of-care for this surgical procedure in patients who have consented to receiving  
15 blood transfusions, requires no additional interventions outside of standard clinical care, and  
16 therefore poses only minimal risk to patients. For the reasons outlined, the study therefore  
17 meets the criteria stated in Article 3.7A of the 2014 Tri-Council Policy Statement on the  
18 Ethical Conduct for Research Involving Humans that define situations where exceptions to  
19 obtaining prior consent are warranted. As per these criteria, written informed consent from the  
20 patient (or a surrogate decision maker) for follow-up and use of their data will be obtained as  
21 soon as possible after randomization. Waiver of patient consent at time of randomization  
22 allows efficient inclusion of a large number of bleeding patients; this is a novelty of the study  
23 design and an approach not used before in bleeding surgical patients.  
24  
25  
26  
27  
28  
29  
30

31 The trial has started recruitment and is registered on the ClinicalTrials.gov registry with the  
32 identifier NCT03037424. At completion of the study, and in accordance with the relevant  
33 guidelines, the Sponsor/Investigator will prepare a clinical study report (CSR) to report the  
34 outcomes of the study, and may publish the data in their entirety as a multi-centre dataset.  
35 We intend to disseminate the findings of the study in a timely fashion at international scientific  
36 meetings, and will publish our findings in the scientific/medical literature.  
37  
38  
39

## 40 **CONCLUSION**

41 This protocol for the phase 3 FIBRES trial describes a multi-centre, randomized, non-  
42 inferiority study comparing the use of fibrinogen concentrate versus cryoprecipitate as active  
43 control in the treatment of acquired hypofibrinogenemia in patients undergoing CPB cardiac  
44 surgery. The study has a number of strengths. First, it utilizes a pragmatic approach and  
45 treatment algorithm that aligns with standard clinical practice. This not only increases the  
46 likelihood of protocol adherence, but also increases generalizability by ensuring that the study  
47 has direct clinical relevance to current treatment practice. Second, the waiver of patient  
48 consent prior to treatment improves study feasibility (cost and time) and minimizes post-  
49 randomization drop-outs. Third, use of an active control group ensures that all randomized  
50 patients receive fibrinogen supplementation according to clinical need. Fourth, the enrollment  
51 of approximately 1,200 patients represents the largest randomized controlled trial in this  
52  
53  
54  
55  
56  
57



1  
2  
3 setting to date.  
4

5 This study in bleeding cardiac surgical patients aims to show efficacy non-inferiority of  
6 fibrinogen concentrate, a highly-purified fibrinogen product that has improved safety, ease of  
7 administration, and a predictable and robust effect on fibrinogen levels, when compared with  
8 cryoprecipitate. A finding of non-inferiority would support the use of this purified fibrinogen  
9 concentrate as an appropriate option for fibrinogen supplementation in acquired  
10 hypofibrinogenemia. Ultimately, the results of this trial are likely to improve the care of cardiac  
11 surgical patients experiencing significant bleeding, an under-studied yet high-risk population.  
12  
13  
14  
15  
16  
17  
18  
19  
20  
21  
22  
23  
24  
25  
26  
27  
28  
29  
30  
31  
32  
33  
34  
35  
36  
37  
38  
39  
40  
41  
42  
43  
44  
45  
46  
47  
48  
49  
50  
51  
52  
53  
54  
55  
56  
57  
58  
59  
60

For peer review only

## ACKNOWLEDGEMENTS

Editorial assistance was provided by Portland Medical Communications Ltd.

## AUTHOR CONTRIBUTIONS

Conception and design (KK, JK); Preparation of the first draft of the manuscript (KK); Critical revision of the manuscript for important intellectual content (KK, JC, VR, NH, MF, MC, DS); Read and approved the final version of the manuscript to be published (KK, JC, VR, NH, MF, MC, DS).

## FUNDING

This work was supported by Octapharma AG through an unrestricted grant for study conduct and the provision of fibrinogen concentrate. Cryoprecipitate was provided by Canadian Blood Services.

## COMPETING INTERESTS

K Karkouti has received support for research and/or honoraria from Octapharma. Jeannie Callum has received support for research through peer-reviewed grants from Canadian Blood Services. Nancy Heddle is the Research Director for the McMaster Centre for Transfusion Research, which receives funding support from Canadian Blood Services and Health Canada.

The remaining authors have no competing interests or conflicts to declare.

## REFERENCES

1. Karkouti K, O'Farrell R, Yau TM, et al. Prediction of massive blood transfusion in cardiac surgery. *Can J Anaesth* 2006;53:781-94.
2. Karkouti K, Wijeyesundera DN, Beattie WS, et al. Variability and predictability of large-volume red blood cell transfusion in cardiac surgery: a multicenter study. *Transfusion* 2007;47:2081-8.
3. Karkouti K, Wijeyesundera DN, Yau TM, et al. The independent association of massive blood loss with mortality in cardiac surgery. *Transfusion* 2004;44:1453-62.
4. Moulton MJ, Creswell LL, Mackey ME, et al. Reexploration for bleeding is a risk factor for adverse outcomes after cardiac operations. *J Thorac Cardiovasc Surg* 1996;111:1037-46.
5. Kozek-Langenecker SA, Ahmed AB, Afshari A, et al. Management of severe perioperative bleeding: guidelines from the European Society of Anaesthesiology: First update 2016. *Eur J Anaesthesiol* 2017;34:332-95.
6. Levy JH, Welsby I, Goodnough LT. Fibrinogen as a therapeutic target for bleeding: a review of critical levels and replacement therapy. *Transfusion* 2014;54:1389-405; quiz 88.
7. Mosesson MW, Siebenlist KR, Meh DA. The structure and biological features of fibrinogen and fibrin. *Ann N Y Acad Sci* 2001;936:11-30.
8. Miesbach W, Schenk J, Alesci S, et al. Comparison of the fibrinogen Clauss assay and the fibrinogen PT derived method in patients with dysfibrinogenemia. *Thromb Res* 2010;126:e428-33.
9. Acharya SS, Dimichele DM. Rare inherited disorders of fibrinogen. *Haemophilia* 2008;14:1151-8.
10. Karkouti K, McCluskey SA, Syed S, et al. The influence of perioperative coagulation status on postoperative blood loss in complex cardiac surgery: a prospective observational study. *Anesth Analg* 2010;110:1533-40.
11. Blome M, Isgro F, Kiessling AH, et al. Relationship between factor XIII activity, fibrinogen, haemostasis screening tests and postoperative bleeding in cardiopulmonary bypass surgery. *Thromb Haemost* 2005;93:1101-7.
12. Karkouti K, Callum J, Crowther MA, et al. The relationship between fibrinogen levels after cardiopulmonary bypass and large volume red cell transfusion in cardiac surgery: an observational study. *Anesth Analg* 2013;117:14-22.
13. Karlsson M, Ternstrom L, Hyllner M, et al. Plasma fibrinogen level, bleeding, and transfusion after on-pump coronary artery bypass grafting surgery: a prospective observational study. *Transfusion* 2008;48:2152-8.
14. Ternstrom L, Radulovic V, Karlsson M, et al. Plasma activity of individual coagulation factors, hemodilution and blood loss after cardiac surgery: a prospective observational study. *Thromb Res* 2010;126:e128-33.
15. Mace H, Lightfoot N, McCluskey S, et al. Validity of Thromboelastometry for Rapid Assessment of Fibrinogen Levels in Heparinized Samples During Cardiac Surgery: A Retrospective, Single-center, Observational Study. *J Cardiothorac Vasc Anesth* 2016;30:90-5.
16. Fenger-Eriksen C, Ingerslev J, Sorensen B. Fibrinogen concentrate--a potential universal hemostatic agent. *Expert Opin Biol Ther* 2009;9:1325-33.
17. Stinger HK, Spinella PC, Perkins JG, et al. The ratio of fibrinogen to red cells transfused affects survival in casualties receiving massive transfusions at an army combat support hospital. *J Trauma* 2008;64:S79-85; discussion S85.
18. Nascimento B, Goodnough LT, Levy JH. Cryoprecipitate therapy. *Br J Anaesth* 2014;113:922-34.
19. Sorensen B, Bevan D. A critical evaluation of cryoprecipitate for replacement of fibrinogen. *Br J Haematol* 2010;149:834-43.
20. Franchini M, Lippi G. Fibrinogen replacement therapy: a critical review of the literature. *Blood Transfus* 2012;10:23-7.
21. Kozek-Langenecker S, Fries D, Spahn DR, et al. III. Fibrinogen concentrate: clinical reality and cautious Cochrane recommendation. *Br J Anaesth* 2014;112:784-7.
22. Fries D. The early use of fibrinogen, prothrombin complex concentrate, and recombinant-activated factor VIIa in massive bleeding. *Transfusion* 2013;53 Suppl 1:91s-95s.
23. Dyke C, Aronson S, Dietrich W, et al. Universal definition of perioperative bleeding in adult cardiac surgery. *J Thorac Cardiovasc Surg* 2014;147:1458-63.e1.

- 1  
2  
3 24. Karkouti K, Callum J, Wijeyesundera DN, et al. Point-of-Care Hemostatic Testing in  
4 Cardiac Surgery: A Stepped-Wedge Clustered Randomized Controlled Trial.  
5 *Circulation* 2016;134:1152-62.  
6 25. Fleming TR, Harrington DP, O'Brien PC. Designs for group sequential tests. *Control Clin*  
7 *Trials* 1984;5:348-61.  
8  
9  
10  
11  
12  
13  
14  
15  
16  
17  
18  
19  
20  
21  
22  
23  
24  
25  
26  
27  
28  
29  
30  
31  
32  
33  
34  
35  
36  
37  
38  
39  
40  
41  
42  
43  
44  
45  
46  
47  
48  
49  
50  
51  
52  
53  
54  
55  
56  
57  
58  
59  
60

For peer review only

1  
2  
3 **FIGURE LEGENDS**  
4

5 **Figure 1.** Study design.  
6

7  
8 *Abbreviations:* CPB, cardiopulmonary bypass.  
9

10  
11  
12  
13 **Figure 2.** Study decision process at the point of the interim analysis.  
14

15  
16 *Abbreviations:* IDSMC, Independent Data and Safety Monitoring Committee; N, number; PI,  
17 Principal Investigator.  
18

19  
20  
21  
22  
23  
24  
25  
26  
27  
28  
29  
30  
31  
32  
33  
34  
35  
36  
37  
38  
39  
40  
41  
42  
43  
44  
45  
46  
47  
48  
49  
50  
51  
52  
53  
54  
55  
56  
57  
58  
59  
60

For peer review only

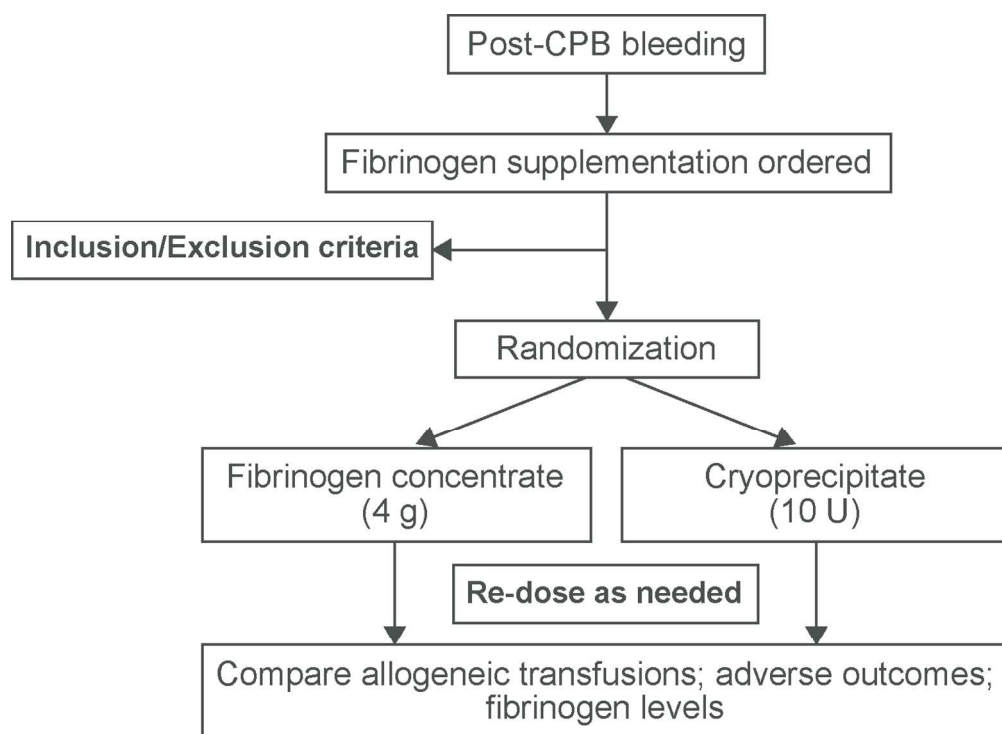

Figure 1. Study design.  
Abbreviations: CPB, cardiopulmonary bypass.

128x93mm (300 x 300 DPI)

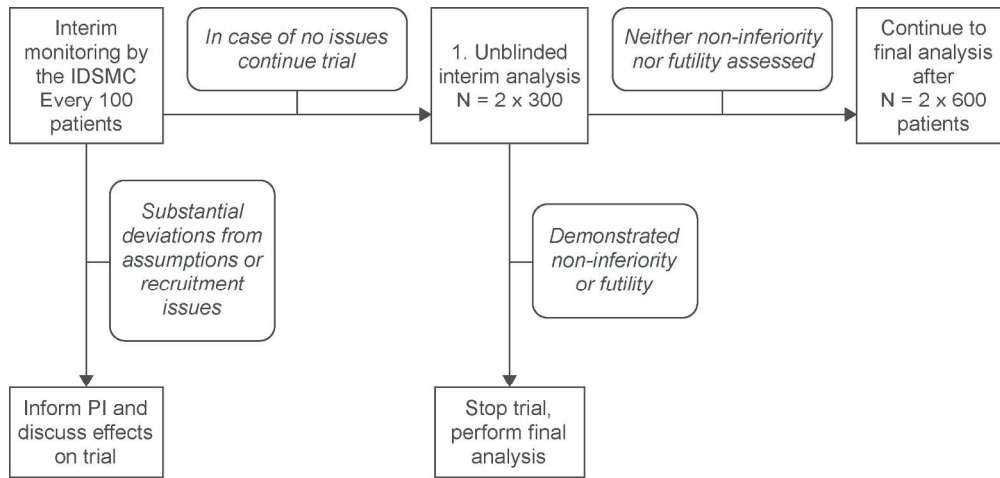

Figure 2. Study decision process at the point of the interim analysis.  
Abbreviations: IDSMC, Independent Data and Safety Monitoring Committee; N, number; PI, Principal Investigator.

204x96mm (300 x 300 DPI)

review only

# BMJ Open

**Protocol for a phase 3, non-inferiority, randomized comparison of a new fibrinogen concentrate vs. cryoprecipitate for treating acquired hypofibrinogenemia in bleeding cardiac surgical patients: the FIBRES trial**

|                                 |                                                                                                                                                                                                                                                                                                                                                                                                                   |
|---------------------------------|-------------------------------------------------------------------------------------------------------------------------------------------------------------------------------------------------------------------------------------------------------------------------------------------------------------------------------------------------------------------------------------------------------------------|
| Journal:                        | <i>BMJ Open</i>                                                                                                                                                                                                                                                                                                                                                                                                   |
| Manuscript ID                   | bmjopen-2017-020741.R1                                                                                                                                                                                                                                                                                                                                                                                            |
| Article Type:                   | Protocol                                                                                                                                                                                                                                                                                                                                                                                                          |
| Date Submitted by the Author:   | 22-Feb-2018                                                                                                                                                                                                                                                                                                                                                                                                       |
| Complete List of Authors:       | Karkouti, K; University of Toronto, Anesthesia<br>Callum, Jeannie; Sunnybrook Health Sciences Centre, Clinical Pathology<br>Rao, Vivek; University of Toronto, Surgery<br>heddle, nancy; mcmaster university, faculty of health sciences<br>Farkouh, Michael; University of Toronto, Medicine<br>Crowther, Mark; McMaster University, Canada<br>Scales, Damon; University of Toronto, Department of Critical Care |
| <b>Primary Subject Heading</b>: | Haematology (incl blood transfusion)                                                                                                                                                                                                                                                                                                                                                                              |
| Secondary Subject Heading:      | Cardiovascular medicine                                                                                                                                                                                                                                                                                                                                                                                           |
| Keywords:                       | Bleeding disorders & coagulopathies < HAEMATOLOGY, Cardiac surgery < SURGERY, Clinical trials < THERAPEUTICS, Blood bank & transfusion medicine < HAEMATOLOGY, HAEMATOLOGY                                                                                                                                                                                                                                        |
|                                 |                                                                                                                                                                                                                                                                                                                                                                                                                   |

SCHOLARONE™  
Manuscripts



1  
2  
3 **Protocol for a phase 3, non-inferiority, randomized comparison of a new**  
4 **fibrinogen concentrate vs. cryoprecipitate for treating acquired**  
5 **hypofibrinogenemia in bleeding cardiac surgical patients: the FIBRES trial**  
6  
7

8 Keyvan Karkouti,<sup>1</sup> Jeannie Callum,<sup>2</sup> Vivek Rao,<sup>3</sup> Nancy Heddle,<sup>4</sup> Michael E Farkouh,<sup>5</sup>  
9 Mark Crowther,<sup>6</sup> Damon C Scales<sup>7</sup>  
10  
11

12 <sup>1</sup> Department of Anesthesia; Faculty of Health Policy, Management, and Evaluation; Peter  
13 Munk Cardiac Centre, and Toronto General Hospital Research Institute, Toronto General  
14 Hospital, University Health Network, University of Toronto, Toronto, Ontario, Canada  
15

16 <sup>2</sup> Department of Clinical Pathology, Sunnybrook Health Sciences Centre; Department of  
17 Laboratory Medicine and Pathobiology, University of Toronto, Ontario, Canada  
18

19 <sup>3</sup> Division of Cardiovascular Surgery, Peter Munk Cardiac Centre and Toronto General  
20 Hospital Research Institute, Toronto General Hospital, University Health Network, University  
21 of Toronto, Toronto, Ontario, Canada  
22

23 <sup>4</sup> Department of Medicine, Faculty of Health Sciences, McMaster University, Hamilton,  
24 Ontario, Canada  
25

26 <sup>5</sup> Peter Munk Cardiac Centre and Heart and Stroke Richard Lewar Centre, University of  
27 Toronto, Toronto, Ontario, Canada  
28

29 <sup>6</sup> Department of Pathology and Molecular Medicine, McMaster University, Hamilton, Ontario,  
30 Canada  
31

32 <sup>7</sup> Department of Critical Care Medicine, Sunnybrook Health Sciences Centre;  
33 Interdepartmental Division of Critical Care and Department of Medicine, University of Toronto,  
34 Toronto, Ontario, Canada  
35  
36

37 ***Corresponding author and Trial Sponsor:***

38 Professor Keyvan Karkouti, Department of Anesthesia, Toronto General Hospital, 200  
39 Elizabeth Street, 3EN-464, Toronto, Ontario, Canada

40 Tel: (416) 340 8597

41 Fax: (416) 340 3698

42 Email: [keyvan.karkouti@uhn.ca](mailto:keyvan.karkouti@uhn.ca)  
43  
44  
45

46 ***Word count:*** 3,410  
47  
48

49 ***Keywords:*** Bleeding disorders and coagulopathies; Cardiac surgery; Clinical trials; Adult  
50 surgery; Blood bank & transfusion medicine; Haematology  
51  
52  
53  
54  
55  
56  
57

## ABSTRACT

**Introduction:** Coagulopathic bleeding is a serious complication of cardiac surgery to which an important contributor is acquired hypofibrinogenemia (plasma fibrinogen <1.5–2.0 g/L). The standard intervention for acquired hypofibrinogenemia is cryoprecipitate, but purified fibrinogen concentrates are also available. There is little comparative data between the two therapies and randomized trials are needed.

**Methods and analysis:** FIBrinogen REplenishment in Surgery (FIBRES) is a multi-center, randomized (1:1), active-control, single-blinded, phase 3 trial in adult cardiac surgical patients experiencing clinically significant bleeding related to acquired hypofibrinogenemia. The primary objective is to demonstrate that fibrinogen concentrate (Octafibrin/Fibryga, Octapharma) is non-inferior to cryoprecipitate. All patients for whom fibrinogen supplementation is ordered by the clinical team within 24 hours of cardiopulmonary bypass will receive 4 g fibrinogen concentrate or 10 units of cryoprecipitate (dose-equivalent to 4 g), based on random allocation and deferred consent. The primary outcome is total red cell, platelet, and plasma transfusions administered within 24 hours of bypass. Secondary outcomes include major bleeding, fibrinogen levels, and adverse events within 28 days. Enrollment of 1,200 patients will provide >90% power to demonstrate non-inferiority. One pre-planned interim analysis will include 600 patients. The pragmatic design and treatment algorithm align with standard practice, aiding adherence and generalizability.

**Ethics and dissemination:** The study is approved by the local research ethics board and will be conducted in accordance with the Declaration of Helsinki, Good Clinical Practice guidelines, and regulatory requirements. Patient consent prior to treatment is waived, as per criteria in the Tri-Council Policy Statement. Results will be published in the scientific/medical literature, and at international congresses. Non-inferiority of purified fibrinogen concentrate would support its use in acquired hypofibrinogenemia. The results are likely to improve care for cardiac surgical patients experiencing significant bleeding, an under-studied yet high-risk population.

**Trial registration:** NCT03037424 (ClinicalTrials.gov).

**Word count:** 294 (max. 300 words)

## STRENGTHS AND LIMITATIONS OF THIS STUDY

*[Up to 5 bullets, no longer than one sentence each, each relating to the methods]*

- This is the largest randomized comparison of fibrinogen concentrate versus cryoprecipitate in adult patients with acquired hypofibrinogenemia due to cardiac surgery involving cardiopulmonary bypass.
- Simple, pragmatic study design that aligns with standard clinical practice will enhance adherence and ensure clinical relevance and generalizability, while stratified randomization by study site is employed to address between-site practice variability.
- Use of an active control, cryoprecipitate, as the comparator guarantees that all patients in the study will receive fibrinogen supplementation as clinically indicated.
- The large sample size of approximately 1,200 patients in this high-risk population will provide >90% power to detect non-inferiority of fibrinogen concentrate to cryoprecipitate.
- It will not be possible to fully blind clinicians to treatment allocation, so all outcome assessors will be blinded to minimize the risk of bias.

## INTRODUCTION

Coagulopathy leading to excessive bleeding is a serious complication of cardiac surgery requiring cardiopulmonary bypass (CPB). Occurring in approximately 10% or more of cases, it often requires massive blood transfusion with allogeneic blood products (ABPs), and is associated with an increased risk of serious postoperative adverse outcomes, including sepsis, renal failure, and death.[1-4] While the causes of coagulopathy in this setting are likely to be multifactorial, acquired hypofibrinogenemia, considered as a deficiency in plasma fibrinogen levels below 1.5–2.0 g/L,[5] is believed to be one of the primary factors.[6]

Fibrinogen is the most abundant clotting factor in the human circulation and plays a pivotal role in hemostasis and the coagulation cascade by promoting clot formation and platelet aggregation.[7] Physiological levels of fibrinogen are typically in the range of 1.5–4.5 g/L,[8] with a half-life following synthesis of approximately four days.[9] A number of factors may contribute to the development of acquired hypofibrinogenemia in cardiac surgery. Fibrinogen loss may result from acute bleeding, dilution of the circulatory volume due to administration of fluids and priming of the CPB circuit, and consumption due to activation of the coagulation cascade during CPB.[10] Since fibrinogen has only a limited reserve in the body, a modest decrease in levels to <1.5–2.0 g/L impairs coagulation and increases the likelihood of bleeding complications.[10-15] Fibrinogen levels have been shown to fall 40–50% during cardiac surgery,[10] with a critical drop observed in approximately 5% of patients.[16] In these patients, fibrinogen supplementation is believed to be essential and is the current standard of care in most jurisdictions.[6,17]

While supplementation of fibrinogen has historically included the use of fresh frozen plasma, the two principal options currently recommended for supplementation in acquired hypofibrinogenemia are cryoprecipitate and purified fibrinogen concentrate.[5] Cryoprecipitate is currently used in North America and is an ABP prepared from fresh frozen plasma through a process of thawing and centrifugation. The clotting factor-enriched precipitate is re-suspended in a small volume of plasma and refrozen. Typical fibrinogen content is around 15 g/L,[18] although this may vary considerably (3–30 g/L) due to inter-donor variability.[19] Cryoprecipitate has largely been withdrawn from most European countries due to safety concerns because it does not undergo pathogen reduction,[20] where treatment with purified human fibrinogen concentrate is the preferred therapeutic choice for hypofibrinogenemia. Fibrinogen concentrate has a number of important advantages over cryoprecipitate, including: significantly higher purity; standardized fibrinogen content, enabling more accurate dosing; faster preparation and administration time; no requirement for blood type matching; and improved safety, particularly through pathogen reduction technology.[6,20-22] Cryoprecipitate remains the most common fibrinogen replacement product in North America and may be a more effective hemostatic agent because it also contains hemostatic factors VIII and XIII, von Willebrand factor, and platelet microparticles.

1  
2  
3  
4 There is scant data comparing cryoprecipitate and fibrinogen concentrate for the treatment of  
5 acquired hypofibrinogenemia; thus, we do not know which of these is the most appropriate  
6 therapy in bleeding cardiac surgical patients. Moreover, mounting evidence indicates that  
7 hemostatic management of patients with coagulopathic bleeding is evolving from the  
8 conventional use of non-purified ABPs to targeted therapeutic algorithms using purified  
9 coagulation factor concentrates such as fibrinogen concentrate.[23] There is therefore a need  
10 for prospective, randomized clinical trials designed to specifically evaluate cryoprecipitate and  
11 fibrinogen concentrate in parallel as part of hemostatic treatment algorithms in bleeding  
12 cardiac surgical patients.  
13  
14  
15  
16

17  
18 Our study design addresses these issues by assessing non-inferiority of a purified fibrinogen  
19 concentrate against cryoprecipitate for the treatment of acquired hypofibrinogenemia in  
20 cardiac surgery. Given the theoretical and logistical advantages of fibrinogen concentrate  
21 relative to cryoprecipitate outlined above, illustrating that fibrinogen concentrate is non-inferior  
22 to cryoprecipitate would support the use of this purified fibrinogen concentrate for hemostatic  
23 management in this high-risk, clinically important setting. Importantly, the conduct of  
24 randomized trials in bleeding surgical patients poses specific challenges, and this trial  
25 incorporates several design features to address these challenges.  
26  
27  
28  
29

## 30 **METHODS AND ANALYSIS**

### 31 **Objective**

32 The primary objective of this study is to demonstrate that the administration of the fibrinogen  
33 concentrate Octafibrin/Fibryga (Octapharma AG, Lachen, Switzerland; currently approved in  
34 Canada for the treatment of congenital afibrinogenemia and hypofibrinogenemia) is non-  
35 inferior to cryoprecipitate for treating bleeding in cardiac surgical patients in whom fibrinogen  
36 supplementation is ordered in accordance with accepted clinical standards.  
37  
38  
39  
40

### 41 **Study design and setting**

42 The FIBrinoGen REplenishment in Surgery (FIBRES) trial is a pragmatic, multi-center,  
43 randomized, active-control, non-inferiority phase 3 trial in adult cardiac surgical patients  
44 experiencing clinically significant bleeding in whom fibrinogen supplementation is deemed to  
45 be necessary. A pragmatic study design was chosen because it allows participating sites and  
46 surgical teams to maintain standard clinical practice when treating patients, making the study  
47 clinically relevant and generalizable to the large population of patients undergoing cardiac  
48 surgery, and increases the likelihood of protocol adherence and successful study completion.  
49 Approximately 1,200 patients will be recruited from up to 12 Canadian hospitals. Patients will  
50 be randomized when fibrinogen supplementation is ordered to either of two treatment groups:  
51 fibrinogen concentrate 4 g (intervention) or cryoprecipitate 10 units (active control). No  
52 placebo arm has been included in the trial because withholding effective treatment is neither  
53  
54  
55  
56  
57  
58  
59  
60

1  
2  
3 consistent with standard practice nor acceptable on ethical grounds. Treatment arm allocation  
4 will be maintained for up to 24 hours after termination of CPB; only the randomly-allocated  
5 fibrinogen replacement product can be provided during this time. No other aspects of care will  
6 be modified. Informed consent will be obtained from patient or surrogate decision maker as  
7 soon as possible after surgery. An overview of the study design is presented in **Figure 1**. The  
8 study commenced in February 2017 and is expected to complete in late 2018, with results  
9 available in early 2019.  
10  
11

### 12 13 **Eligibility criteria**

14  
15 The study will enroll all adult patients undergoing cardiac surgery with CPB for whom  
16 fibrinogen supplementation is ordered by the clinicians in response to post-CPB hemorrhage  
17 in the presence of confirmed or suspected acquired hypofibrinogenemia (fibrinogen level  
18 <1.5–2.0 g/L). The exclusion criteria are: receipt of either fibrinogen concentrate or  
19 cryoprecipitate within 24 hours before surgery; a history of severe allergic reaction to  
20 fibrinogen concentrate or cryoprecipitate; known refusal of ABPs or either study treatment  
21 (*i.e.*, for religious reasons); a known fibrinogen level >3.0 g/L within 30 minutes of the order  
22 for treatment (to eliminate the risk of raising a patient's fibrinogen level above the upper limit  
23 of the normal range [4.0 g/L]); and known pregnancy.  
24  
25  
26  
27

### 28 29 **Interventions**

#### 30 **Intervention**

31 Patients randomized to the intervention group will receive fibrinogen concentrate  
32 administered by slow (over 10 minutes) intravenous injection immediately after reconstitution  
33 with 50 mL of sterile water for injection, as per the manufacturer's instructions. Patients  
34 randomized to this group will receive 4 g of fibrinogen concentrate each time fibrinogen  
35 supplementation is ordered during the first 24 hours after termination of CPB surgery.  
36  
37  
38

#### 39 **Active control**

40  
41 Those patients randomized to the active control group will each receive cryoprecipitate, given  
42 as 10 units (dose-equivalent to approximately 4 g [median 388 mg, range 120–796 mg, per  
43 bag], as per internal Canadian Blood Services quality control data; personal communication,  
44 Canadian Blood Services [24]) each time fibrinogen supplementation is ordered during the  
45 first 24 hours after termination of CPB. Cryoprecipitate will be prepared according to current  
46 Health Canada standards and administered by intravenous infusion following hospital  
47 transfusion policies at each of the participating study sites.  
48  
49  
50

51  
52 In both study arms, study treatment (fibrinogen concentrate or cryoprecipitate) may be  
53 administered prior to the determination of fibrinogen levels in a patient that is bleeding if  
54 deemed appropriate as per current clinical standards (*i.e.*, rapid bleeding precluding waiting  
55 for laboratory results). If fibrinogen supplementation is needed after the 24-hour study period  
56  
57

1  
2  
3 is over, patients will receive cryoprecipitate, which is the current standard-of-care in most of  
4 Canada. Concomitant medications to treat bleeding that are part of standard patient care will  
5 be permitted throughout the study, but must be recorded in the case report form (CRF).  
6  
7

### 8 **Outcomes and study duration**

9  
10 The primary outcome of the study is one of efficacy; specifically, comparison between study  
11 groups of the total number of red cells, platelets, and plasma administered during the first 24  
12 hours after termination of CPB surgery.  
13

14  
15 Secondary outcomes of the study will include both efficacy and safety outcomes. For the  
16 former, the secondary outcomes are: 1) comparison of the total number of ABPs (not  
17 including cryoprecipitate) administered from the start of surgery up to seven days after  
18 surgery (or discharge if earlier); 2) comparison of major bleeding (using the modified universal  
19 definition of perioperative bleeding [UDPB] in cardiac surgery)[25] during the first 24 hours  
20 after termination of CPB; and 3) comparison of the effect of treatment on plasma fibrinogen  
21 levels, determined by the change from within 75 minutes before to 75 minutes after  
22 completion of the first dose of fibrinogen supplementation. The secondary safety outcomes  
23 are: 1) adverse events (AEs) and serious AEs (SAEs) up to 28 days postoperatively; 2) a  
24 composite AE grouping (death, myocardial infarction, stroke, acute liver injury, acute kidney  
25 injury, and thromboembolic events) up to 28 days postoperatively; and 3) the duration of  
26 mechanical ventilation, the length of intensive care unit (ICU) admission, and total duration of  
27 hospitalization, all censored at 28 days postoperatively.  
28  
29  
30  
31  
32  
33

34 The duration of the treatment period is 24 hours (from termination of CPB), and the duration  
35 of the study for each individual patient is 28 days.  
36  
37

### 38 **Sample size**

39  
40 The sample size for this study was calculated based on the primary objective of  
41 demonstrating efficacy non-inferiority of the intervention (fibrinogen concentrate) relative to an  
42 active control (cryoprecipitate), with respect to the primary outcome. Determination of non-  
43 inferiority is based on a type I error probability of  $\alpha = 0.025$  and a clinical non-inferiority  
44 margin of  $\delta = 0.20$  around the mean units transfused. The choice of non-inferiority margin  
45 was largely motivated by the large degree of variation in utilization of blood products that is to  
46 be expected from previous studies reflecting current clinical practice, and clinical relevance in  
47 this setting.[26]  
48  
49  
50

51  
52 An empirical distribution function with a mean of 16 units and standard deviation of 14 units  
53 was calculated based on data from a previous study by Karkouti *et al* (each dose of apheresis  
54 or pooled platelets was counted as 4 units to correspond with the number of units in pooled  
55 platelets).[26] This was used to estimate study power by performing 10,000 simulations for  
56  
57

1  
2  
3 each of the different possible sample sizes. Using this approach, we calculated an empirical  
4 power >90% with a sample size  $\geq 550$  patients in each treatment group. Therefore, and  
5 assuming a 10% drop-out rate (patients randomized but not treated, or lost to-follow-up) for  
6 the study based on the use of two treatments that are within the standard-of-care for CPB  
7 surgery, the planned total sample size is 1,200 patients (600 per treatment group).  
8  
9

### 10 **Randomization and blinding**

11 The randomization schedule will be prepared by an independent biostatistician not involved in  
12 the conduct of the study using a permuted-block, random allocation schedule. As transfusion  
13 practice is not standardized, randomization will be stratified by study site. The random  
14 allocation schedule will be provided to participating centers in opaque, consecutively  
15 numbered envelopes and neither healthcare providers nor individuals responsible for  
16 randomizing patients will be aware of the treatment allocation at the time fibrinogen  
17 supplementation is ordered.  
18  
19  
20  
21  
22

23 Patients will be randomized in a ratio of 1:1 to either the intervention (fibrinogen concentrate)  
24 group or the active control (cryoprecipitate) by the blood bank technologist once the order for  
25 fibrinogen supplementation is received and inclusion/exclusion criteria are confirmed. The  
26 requirement for informed consent prior to randomization will be waived (see Ethics section).  
27 Patients will be blinded to treatment allocation throughout the study; treating clinicians will  
28 remain blinded only up to the point of use since the study products have distinct physical  
29 appearances and maintaining blinding is not logistically possible. All attempts will be made to  
30 blind clinicians outside of the operating room and ICU, as well as outcome assessors, to the  
31 treatment allocation.  
32  
33  
34  
35  
36

### 37 **Data analysis plan**

#### 38 **Data collection and management**

39 Data collection will occur following randomization and procurement of consent (see Ethics  
40 section). Full details of the data to be collected during the study, together with the timing and  
41 frequency of data collection, are provided in **Table 1**.  
42  
43  
44  
45  
46  
47  
48  
49  
50  
51  
52  
53  
54  
55  
56  
57  
58  
59  
60



1  
2  
3  
4  
5  
6  
7  
8  
9  
10  
11  
12  
13  
14  
15  
16  
17  
18  
19  
20  
21  
22  
23  
24  
25  
26  
27  
28  
29  
30  
31  
32  
33  
34  
35  
36  
37  
38  
39  
40  
41  
42  
43  
44  
45  
46  
47

**Table 1.** Flow chart of study procedures and assessments performed at each study visit.

| <b>Procedures</b>                                       | <b>Prior to Enrollment</b> | <b>Visit 1</b><br>Post-randomization<br>(0–24 h)* | <b>Visit 2</b><br>POD7/DC | <b>Visit 3</b><br>POD28 |
|---------------------------------------------------------|----------------------------|---------------------------------------------------|---------------------------|-------------------------|
| <b>Blood bank receives fibrinogen order<sup>a</sup></b> | <b>X</b>                   | <b>(X)<sup>e</sup></b>                            |                           |                         |
| <b>Inclusion and exclusion criteria</b>                 | <b>X</b>                   |                                                   |                           |                         |
| <b>Randomization</b>                                    | <b>X</b>                   |                                                   |                           |                         |
| <b>IMP administration<sup>b</sup></b>                   |                            | <b>X</b>                                          |                           |                         |
| <b>Patient (surrogate) debriefing and consent</b>       | <b>X</b>                   |                                                   |                           |                         |
| <b>Obtain delayed consent</b>                           |                            | <b>X</b>                                          | <b>(X)</b>                |                         |
| <b>Baseline data</b>                                    |                            |                                                   |                           |                         |
| Demographics                                            |                            | <b>X</b>                                          |                           |                         |
| Medical history                                         |                            | <b>X</b>                                          |                           |                         |
| Preoperative medications                                |                            | <b>X</b>                                          |                           |                         |
| <b>Surgical data</b>                                    |                            |                                                   |                           |                         |
| Intraoperative medications                              |                            | <b>X</b>                                          |                           |                         |
| CPB time                                                |                            | <b>X</b>                                          |                           |                         |
| Cross-clamp time                                        |                            | <b>X</b>                                          |                           |                         |
| Circulatory arrest                                      |                            | <b>X</b>                                          |                           |                         |
| Vital signs                                             |                            | <b>X</b>                                          |                           |                         |
| Fluid in- and output monitoring                         |                            | <b>X</b>                                          |                           |                         |

| <b>Procedures</b>                           | <b>Prior to Enrollment</b> | <b>Visit 1</b><br>Post-randomization<br>(0–24 h)* | <b>Visit 2</b><br>POD7/DC | <b>Visit 3</b><br>POD28 |
|---------------------------------------------|----------------------------|---------------------------------------------------|---------------------------|-------------------------|
| Inotropes and vasopressors                  |                            | X                                                 |                           |                         |
| <b>Laboratory assessments</b>               |                            |                                                   |                           |                         |
| Chemistry <sup>c</sup>                      |                            | X                                                 | X                         |                         |
| Hematology <sup>c</sup>                     |                            | X <sup>f</sup>                                    | X                         |                         |
| Coagulation profile <sup>c</sup>            |                            | X <sup>f</sup>                                    | X                         |                         |
| Safety labs <sup>c</sup>                    |                            | X                                                 | X                         |                         |
| <b>Transfusion requirements<sup>d</sup></b> |                            |                                                   |                           |                         |
| RBCs                                        |                            | X                                                 | X                         |                         |
| Pooled and apheresis Platelets              |                            | X                                                 | X                         |                         |
| Plasma                                      |                            | X                                                 | X                         |                         |
| Other hemostatic products                   |                            | X                                                 | X                         |                         |
| <b>Blood loss determination using UDPB</b>  |                            | X                                                 | X                         |                         |
| <b>Extubation time</b>                      |                            | X                                                 | (X)                       | (X)                     |
| <b>ICU length of stay</b>                   |                            | X                                                 | (X)                       | (X)                     |
| <b>Hospital length of stay</b>              |                            |                                                   | X                         | (X)                     |
| <b>AEs and SAEs</b>                         |                            | X                                                 | X                         | X                       |
| <b>Concomitant medications</b>              |                            | X                                                 | X                         | X                       |
| <b>Physical examination</b>                 |                            | X                                                 |                           |                         |

\* For any activities not completed during this visit, additional visits will be undertaken to complete activities

1  
2  
3  
4  
5  
6  
7  
8  
9  
10  
11  
12  
13  
14  
15  
16  
17  
18  
19  
20  
21  
22  
23  
24  
25  
26  
27  
28  
29  
30  
31  
32  
33  
34  
35  
36  
37  
38  
39  
40  
41  
42  
43  
44  
45  
46  
47

<sup>a</sup> After the start of surgery and during or after CPB

<sup>b</sup> IMP will first be administered after CPB termination

<sup>c</sup> As per standard practice.

<sup>d</sup> From beginning of surgery to postoperative day 7.

<sup>e</sup> Patients will be treated according to their group allocation for any subsequent doses needed during the treatment period (up to 24 hours after termination of CPB).

<sup>f</sup> Prior to and up to 75 minutes after IMP administration.

( ) if needed.

*Abbreviations:* AE, adverse event; CPB, cardiopulmonary bypass; DC, discharge; ICU, intensive care unit; IMP, investigational medicinal product; POD, postoperative day; RBC, red blood cell; SAE, serious adverse event; UDPB, universal definition of perioperative bleeding.

1  
2  
3 All source records and source data will be maintained by the site investigator and preserved  
4 as stipulated by the regulatory authorities. An Electronic Data Capture (EDC) system will be  
5 used to collect study data. All patient information and data will be maintained as confidential,  
6 and patients will only be identified using a sequential numbering system. The site investigator  
7 will maintain a confidential patient identification code list.  
8  
9

### 10 Statistical methods

11 In this randomized, active control, non-inferiority trial, statistical analysis of the primary  
12 efficacy outcome will be conducted according to modified intention-to-treat (ITT) principles.  
13 The mITT population will comprise all randomized eligible patients who undergo cardiac  
14 surgery, receive at least one (partial or complete) dose of the allocated treatment and for  
15 whom consent was obtained (see Ethics section). A secondary analysis will also be  
16 performed for the per-protocol (PP) population, which excludes patients with major protocol  
17 deviations (for example, receiving the incorrect treatment, receiving <80% of the planned  
18 dose, or missing the primary efficacy assessment).  
19  
20  
21  
22  
23

24 To demonstrate that treatment with fibrinogen concentrate (intervention) is clinically non-  
25 inferior to cryoprecipitate (active control) with respect to the primary outcome, a two-sample,  
26 one-sided test of the hypotheses:  $H_0: \mu_F/\mu_c \geq (1 + \delta)$  (inferiority), and  $H_1: \mu_F/\mu_c < (1 + \delta)$   
27 (non-inferiority), will be conducted (where  $\mu_F$  and  $\mu_c$  denote the mean number of transfused  
28 units in the fibrinogen concentrate and cryoprecipitate treatment groups, respectively). This  
29 will be based on a Poisson regression model (generalized linear model for count data with  
30 log-link function and a Poisson error term [27]) and clinical non-inferiority margin of  $\delta = 0.20$   
31 around the mean units transfused. Non-inferiority of fibrinogen concentrate will be concluded  
32 if the upper limit of the one-sided confidence interval (CI) for the ratio  $\mu_F/\mu_c$  is less than  $(1 +$   
33  $\delta)$ . Where non-inferiority is demonstrated, a test for clinical superiority of fibrinogen  
34 concentrate with respect to the number of ABPs transfused will be performed by testing the  
35 hypotheses:  $H'_0: \mu_F/\mu_c \geq 1$  (inferiority), and  $H'_1: \mu_F/\mu_c < 1$  (superiority),  
36  
37  
38  
39  
40  
41

42 We also plan to examine a number of exploratory secondary outcomes in the analysis of  
43 efficacy: the number of ABPs administered from beginning of surgery up to 7 days  
44 postoperatively and within 24 hours after CPB termination, stratified by ABP type, will be  
45 examined using point estimates with two-sided 95% CIs, and descriptive statistics; major  
46 bleeding type will be evaluated by frequency distributions; and change in fibrinogen levels  
47 within 60 minutes before and after intervention will be tested using the Wilcoxon rank-sum  
48 test, and the Hodges-Lehmann estimator of median differences with 95% CIs. Analyses for  
49 efficacy will also be performed in patient subgroups, classified based on urgency and  
50 complexity of surgery.  
51  
52  
53  
54

55 Evaluation of safety outcomes, AEs, and SAEs will be conducted in the safety analysis  
56  
57

1  
2  
3 population (SAF), comprising all patients who receive at least one dose of study drug and  
4 provide informed consent (see Ethics section). Analysis of AEs will focus on treatment  
5 emergent adverse events (TEAEs), defined as AEs that start or worsen after the start of  
6 treatment (intervention or active control group). This analysis will be based on calculating  
7 point estimates and two-sided 95% CIs, in addition to descriptive statistics.  
8  
9

10  
11 The number of patients who died will be summarized. A possible difference between  
12 treatment groups will be estimated by the risk ratio with 95% CI. Kaplan-Meier estimates for  
13 the time to death distribution will be calculated and graphically presented.  
14  
15

16  
17 One pre-planned interim analysis will be conducted after 600 patients have been randomized.  
18 This will take the form of an unblinded interim analysis using an adjusted type I error rate  
19 according to the O'Brien-Fleming method.[28] At this point, enrollment may be stopped if a  
20 positive outcome, *i.e.*, rejection of  $H_0$ , is demonstrated based on the adjusted one-sided  
21 significance level of  $\alpha = 0.00258$  (efficacy stop), or if the predictive power for the test of non-  
22 inferiority is less than 0.25 (futility stop) (**Figure 2**). The study will continue as planned if  
23 neither scenario is fulfilled at the interim analysis. A final analysis will then be performed after  
24 an additional 600 patients have been randomized at the adjusted significance level of  $\alpha =$   
25 0.02242 to maintain the overall one-sided significance level of 0.025.  
26  
27  
28  
29

### 30 **Monitoring and quality control and assurance**

31 An Independent Data and Safety Monitoring Committee (IDSMC) will be established by the  
32 Sponsor to review study data after each (approximately) 100 patients have been randomized.  
33 A meeting will also be convened to specifically evaluate the outcome of the pre-planned  
34 interim analysis. Meetings of the committee may also be called at other times, as deemed  
35 necessary based on occurrence of serious adverse events or any logistical concerns. The  
36 results of each IDSMC meeting will be communicated to the Principal Investigator and study  
37 Sponsor within 15 days, or earlier in matters relating to ensuring patient safety and/or study  
38 integrity. The IDSMC will comprise a minimum of three voting members with collective  
39 expertise in the fields of statistics, perioperative medicine, and hematology, who will review  
40 accumulating data pertaining to efficacy, safety, outcomes, and other study aspects such as  
41 recruitment, compliance, data quality, and risk versus benefit. The IDSMC will provide  
42 recommendations regarding the continuation, modification, or termination of the study, as  
43 appropriate. The duties and responsibilities of the IDSMC will be defined in a written, study-  
44 specific charter. Ultimately, the role of the IDSMC will be to protect and serve study  
45 participants, and to assist and advise the Principal Investigator and study Sponsor in the  
46 overall conduct, interpretation, validity, integrity, and ongoing relevance of the study. The  
47 sponsor will have ultimate authority in all aspects of the trial and will have access to the final  
48 trial dataset.  
49  
50  
51  
52  
53  
54  
55  
56  
57  
58  
59  
60

1  
2  
3 For quality control and assurance purposes, periodic monitoring of all study-related source  
4 data/records, adherence to the approved study protocol, and the completeness and accuracy  
5 of CRFs will be undertaken by an appointed independent study monitor. Full and direct  
6 access to all source documents will be provided. All study-related material will also be made  
7 available to independent quality assurance auditors and regulatory inspectors, as required.  
8  
9

## 10 **ETHICS AND DISSEMINATION**

11 The study will be conducted in accordance with the ethical principles defined by the  
12 Declaration of Helsinki, and in compliance with the approved study protocol, Good Clinical  
13 Practice (GCP) guidelines, and all appropriate regulatory requirements (including collecting  
14 and reporting of serious adverse events) governing the study centers participating in the trial.  
15 The study, study protocol, and all other study documents have been approved by the  
16 University Health Network's (the coordinating center) research ethics board (REB # 16-5636;  
17 Approval date: 12 Jan, 2017), the local REB of all participating sites, and regulatory authority  
18 (Health Canada). The trial is registered at [clinicaltrials.gov](http://clinicaltrials.gov) (Identifier: NCT03037424).  
19 Changes to protocol will be communicated by the Sponsor to all REBs, Health Canada, and  
20 will be documented on [clinicaltrials.gov](http://clinicaltrials.gov).  
21  
22  
23  
24  
25  
26

27 Due to the emergency nature of the clinical setting, *i.e.*, bleeding during or after surgery, all  
28 patients included in the study will be incapable of providing informed consent at the time  
29 treatment is required. Furthermore, delays brought about by obtaining surrogate consent can  
30 be severely detrimental to patient well-being. Moreover, this bleeding complication occurs  
31 infrequently (approximately 5% of cases) and cannot be reliably predicted before surgery, and  
32 a requirement to obtain prior consent from patients would make it impracticable to conduct  
33 the study. The study compares two fibrinogen replacement sources that are currently within  
34 the standard-of-care for this surgical procedure in patients who have consented to receiving  
35 blood transfusions, requires no additional interventions outside of standard clinical care, and  
36 therefore poses only minimal risk to patients. For the reasons outlined, the study therefore  
37 meets the criteria stated in Article 3.7A of the 2014 Tri-Council Policy Statement on the  
38 Ethical Conduct for Research Involving Humans that define situations where exceptions to  
39 obtaining prior consent are warranted. As per these criteria, written informed consent for  
40 follow-up and use of the patients' data will be obtained within 24-48 hours after randomization.  
41 If the patient is not capable of providing informed consent, consent will be sought from the  
42 surrogate decision maker. Patients will then be re-visited every few days up to postoperative  
43 day 28 to obtain their direct consent where possible. Waiver of patient consent at time of  
44 randomization allows efficient inclusion of a large number of bleeding patients and minimizes  
45 post-randomization drop-outs; this is a novelty of the study design and an approach not  
46 commonly used in bleeding surgical patients.  
47  
48  
49  
50  
51  
52  
53  
54  
55  
56  
57  
58  
59  
60

1  
2  
3 At completion of the study, and in accordance with the relevant guidelines, the  
4 Sponsor/Investigator will prepare a clinical study report (CSR) to report the outcomes of the  
5 study, and may publish the data in their entirety as a multi-center dataset. We intend to  
6 disseminate the findings of the study in a timely fashion at international scientific meetings,  
7 and will publish our findings in the scientific/medical literature.  
8  
9

## 10 **PATIENT AND PUBLIC INVOLVEMENT**

11  
12  
13 Patients and the public were not involvement in the design of the study.  
14  
15

## 16 **CONCLUSION**

17 This protocol for the phase 3 FIBRES trial describes a multi-center, randomized, non-  
18 inferiority study comparing the use of fibrinogen concentrate versus cryoprecipitate as active  
19 control in the treatment of acquired hypofibrinogenemia in patients undergoing CPB cardiac  
20 surgery. The study has a number of strengths. First, it utilizes a pragmatic approach and  
21 treatment algorithm that aligns with standard clinical practice. This not only increases the  
22 likelihood of protocol adherence, but also increases generalizability by ensuring that the study  
23 has direct clinical relevance to current treatment practice. Second, the waiver of patient  
24 consent prior to treatment improves study feasibility (cost and time) and minimizes post-  
25 randomization drop-outs. Third, use of an active control group ensures that all randomized  
26 patients receive fibrinogen supplementation according to clinical need. Fourth, the enrollment  
27 of approximately 1,200 patients represents the largest randomized controlled trial in this  
28 setting to date.  
29  
30  
31  
32  
33

34  
35 This study in bleeding cardiac surgical patients aims to show efficacy non-inferiority of  
36 fibrinogen concentrate, a highly-purified fibrinogen product that has improved safety, ease of  
37 administration, and a predictable and robust effect on fibrinogen levels, when compared with  
38 cryoprecipitate. A finding of non-inferiority would support the use of this purified fibrinogen  
39 concentrate as an appropriate option for fibrinogen supplementation in acquired  
40 hypofibrinogenemia. Ultimately, the results of this trial are likely to improve the care of cardiac  
41 surgical patients experiencing significant bleeding, an under-studied yet high-risk population.  
42  
43  
44  
45  
46  
47  
48  
49  
50  
51  
52  
53  
54  
55  
56  
57  
58  
59  
60

## ACKNOWLEDGMENTS

Editorial assistance was provided by Portland Medical Communications Ltd.

## AUTHOR CONTRIBUTIONS

Conception and design (KK, JC); Preparation of the first draft of the manuscript (KK); Critical revision of the manuscript for important intellectual content (KK, JC, VR, NH, MF, MC, DS); Read and approved the final version of the manuscript to be published (KK, JC, VR, NH, MF, MC, DS).

## FUNDING

This work was supported by Octapharma AG through an unrestricted grant for study conduct and the provision of fibrinogen concentrate. Cryoprecipitate was provided by Canadian Blood Services.

## COMPETING INTERESTS

K Karkouti has received support for research and/or honoraria from Octapharma. Jeannie Callum has received support for research through peer-reviewed grants from Canadian Blood Services. Nancy Heddle is the Research Director for the McMaster Centre for Transfusion Research, which receives funding support from Canadian Blood Services and Health Canada.

The remaining authors have no competing interests or conflicts to declare.



## REFERENCES

1. Karkouti K, O'Farrell R, Yau TM, et al. Prediction of massive blood transfusion in cardiac surgery. *Can J Anaesth* 2006;53:781-94.
2. Karkouti K, Wijeyesundera DN, Beattie WS, et al. Variability and predictability of large-volume red blood cell transfusion in cardiac surgery: a multicenter study. *Transfusion* 2007;47:2081-8.
3. Karkouti K, Wijeyesundera DN, Yau TM, et al. The independent association of massive blood loss with mortality in cardiac surgery. *Transfusion* 2004;44:1453-62.
4. Moulton MJ, Creswell LL, Mackey ME, et al. Reexploration for bleeding is a risk factor for adverse outcomes after cardiac operations. *J Thorac Cardiovasc Surg* 1996;111:1037-46.
5. Kozek-Langenecker SA, Ahmed AB, Afshari A, et al. Management of severe perioperative bleeding: guidelines from the European Society of Anaesthesiology: First update 2016. *Eur J Anaesthesiol* 2017;34:332-95.
6. Levy JH, Welsby I, Goodnough LT. Fibrinogen as a therapeutic target for bleeding: a review of critical levels and replacement therapy. *Transfusion* 2014;54:1389-405; quiz 88.
7. Mosesson MW, Siebenlist KR, Meh DA. The structure and biological features of fibrinogen and fibrin. *Ann N Y Acad Sci* 2001;936:11-30.
8. Miesbach W, Schenk J, Alesci S, et al. Comparison of the fibrinogen Clauss assay and the fibrinogen PT derived method in patients with dysfibrinogenemia. *Thromb Res* 2010;126:e428-33.
9. Acharya SS, Dimichele DM. Rare inherited disorders of fibrinogen. *Haemophilia* 2008;14:1151-8.
10. Karkouti K, McCluskey SA, Syed S, et al. The influence of perioperative coagulation status on postoperative blood loss in complex cardiac surgery: a prospective observational study. *Anesth Analg* 2010;110:1533-40.
11. Blome M, Isgro F, Kiessling AH, et al. Relationship between factor XIII activity, fibrinogen, haemostasis screening tests and postoperative bleeding in cardiopulmonary bypass surgery. *Thromb Haemost* 2005;93:1101-7.
12. Karkouti K, Callum J, Crowther MA, et al. The relationship between fibrinogen levels after cardiopulmonary bypass and large volume red cell transfusion in cardiac surgery: an observational study. *Anesth Analg* 2013;117:14-22.
13. Karlsson M, Ternstrom L, Hyllner M, et al. Plasma fibrinogen level, bleeding, and transfusion after on-pump coronary artery bypass grafting surgery: a prospective observational study. *Transfusion* 2008;48:2152-8.
14. Ternstrom L, Radulovic V, Karlsson M, et al. Plasma activity of individual coagulation factors, hemodilution and blood loss after cardiac surgery: a prospective observational study. *Thromb Res* 2010;126:e128-33.
15. Yang L, Vuylsteke A, Gerrard C, et al. Postoperative fibrinogen level is associated with postoperative bleeding following cardiothoracic surgery and the effect of fibrinogen replacement therapy remains uncertain. *J Thromb Haemost* 2013;11:1519-26.
16. Mace H, Lightfoot N, McCluskey S, et al. Validity of Thromboelastometry for Rapid Assessment of Fibrinogen Levels in Heparinized Samples During Cardiac Surgery: A Retrospective, Single-center, Observational Study. *J Cardiothorac Vasc Anesth* 2016;30:90-5.
17. Fenger-Eriksen C, Ingerslev J, Sorensen B. Fibrinogen concentrate--a potential universal hemostatic agent. *Expert Opin Biol Ther* 2009;9:1325-33.
18. Stinger HK, Spinella PC, Perkins JG, et al. The ratio of fibrinogen to red cells transfused affects survival in casualties receiving massive transfusions at an army combat support hospital. *J Trauma* 2008;64:S79-85; discussion S85.
19. Nascimento B, Goodnough LT, Levy JH. Cryoprecipitate therapy. *Br J Anaesth* 2014;113:922-34.
20. Sorensen B, Bevan D. A critical evaluation of cryoprecipitate for replacement of fibrinogen. *Br J Haematol* 2010;149:834-43.
21. Franchini M, Lippi G. Fibrinogen replacement therapy: a critical review of the literature. *Blood Transfus* 2012;10:23-7.
22. Kozek-Langenecker S, Fries D, Spahn DR, et al. III. Fibrinogen concentrate: clinical reality and cautious Cochrane recommendation. *Br J Anaesth* 2014;112:784-7.

- 1
- 2
- 3 23. Fries D. The early use of fibrinogen, prothrombin complex concentrate, and recombinant-
- 4 activated factor VIIa in massive bleeding. *Transfusion* 2013;53 Suppl 1:91s-95s.
- 5 24. Callum JL, Karkouti K, Lin Y. Cryoprecipitate: the current state of knowledge. *Transfus*
- 6 *Med Rev* 2009;23:177-88.
- 7 25. Dyke C, Aronson S, Dietrich W, et al. Universal definition of perioperative bleeding in
- 8 adult cardiac surgery. *J Thorac Cardiovasc Surg* 2014;147:1458-63.e1.
- 9 26. Karkouti K, Callum J, Wijeyesundera DN, et al. Point-of-Care Hemostatic Testing in
- 10 Cardiac Surgery: A Stepped-Wedge Clustered Randomized Controlled Trial.
- 11 *Circulation* 2016;134:1152-62.
- 12 27. Cameron AC, Trivedi PK. Regression Analysis of Count Data. First ed. Cambridge, UK:
- 13 Cambridge University Press 1998.
- 14 28. Fleming TR, Harrington DP, O'Brien PC. Designs for group sequential tests. *Control Clin*
- 15 *Trials* 1984;5:348-61.
- 16
- 17
- 18
- 19
- 20
- 21
- 22
- 23
- 24
- 25
- 26
- 27
- 28
- 29
- 30
- 31
- 32
- 33
- 34
- 35
- 36
- 37
- 38
- 39
- 40
- 41
- 42
- 43
- 44
- 45
- 46
- 47
- 48
- 49
- 50
- 51
- 52
- 53
- 54
- 55
- 56
- 57
- 58
- 59
- 60

For peer review only

1  
2  
3 **FIGURE LEGENDS**  
4

5 **Figure 1.** Study design.  
6

7  
8 *Abbreviations:* CPB, cardiopulmonary bypass.  
9

10  
11  
12  
13 **Figure 2.** Study decision process at the point of the interim analysis.  
14

15  
16 *Abbreviations:* IDSMC, Independent Data and Safety Monitoring Committee; N, number; PI,  
17 Principal Investigator.  
18  
19  
20  
21  
22  
23  
24  
25  
26  
27  
28  
29  
30  
31  
32  
33  
34  
35  
36  
37  
38  
39  
40  
41  
42  
43  
44  
45  
46  
47  
48  
49  
50  
51  
52  
53  
54  
55  
56  
57  
58  
59  
60

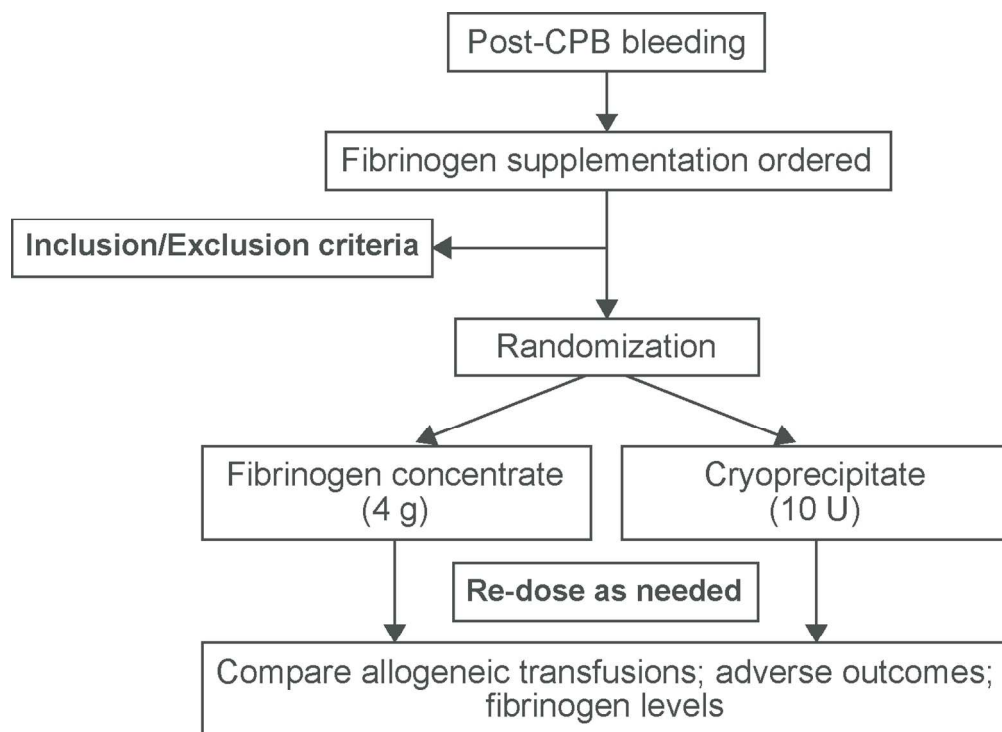

Figure 1. Study design.  
Abbreviations: CPB, cardiopulmonary bypass.

128x93mm (300 x 300 DPI)

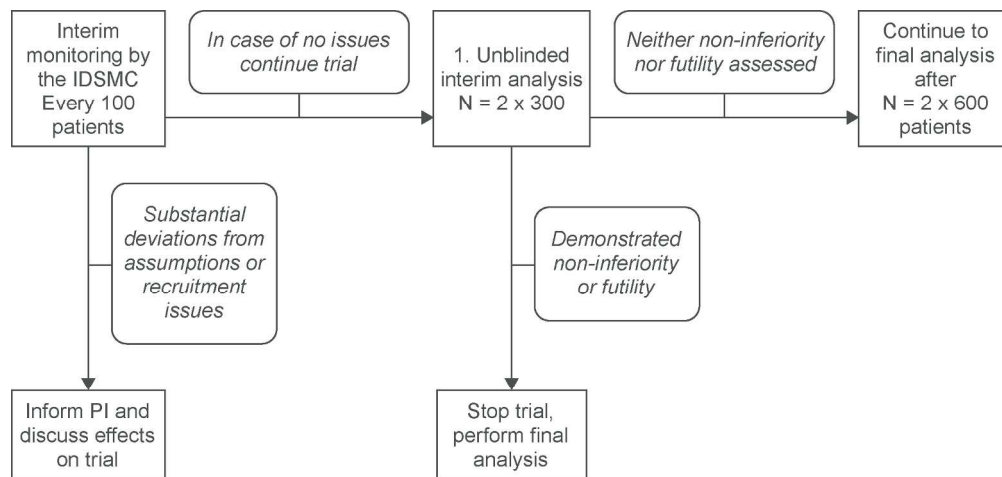

23 Figure 2. Study decision process at the point of the interim analysis.  
24 Abbreviations: IDSMC, Independent Data and Safety Monitoring Committee; N, number; PI, Principal  
25 Investigator.

26 204x96mm (300 x 300 DPI)

27  
28  
29  
30  
31  
32  
33  
34  
35  
36  
37  
38  
39  
40  
41  
42  
43  
44  
45  
46  
47  
48  
49  
50  
51  
52  
53  
54  
55  
56  
57  
58  
59  
60

review only

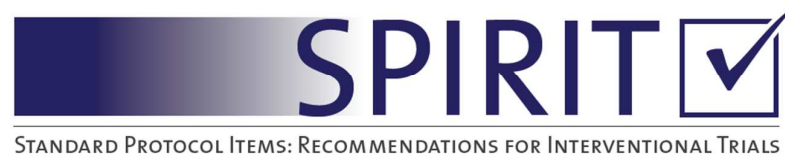

SPIRIT 2013 Checklist: Recommended items to address in a clinical trial protocol and related documents\*

| Section/item                      | Item No | Description                                                                                                                                                                                                                                                                              | Addressed on page number |
|-----------------------------------|---------|------------------------------------------------------------------------------------------------------------------------------------------------------------------------------------------------------------------------------------------------------------------------------------------|--------------------------|
| <b>Administrative information</b> |         |                                                                                                                                                                                                                                                                                          |                          |
| Title                             | 1       | Descriptive title identifying the study design, population, interventions, and, if applicable, trial acronym                                                                                                                                                                             | <u>1</u>                 |
| Trial registration                | 2a      | Trial identifier and registry name. If not yet registered, name of intended registry                                                                                                                                                                                                     | <u>2, 14</u>             |
|                                   | 2b      | All items from the World Health Organization Trial Registration Data Set                                                                                                                                                                                                                 | <u>–</u>                 |
| Protocol version                  | 3       | Date and version identifier                                                                                                                                                                                                                                                              | <u>–</u>                 |
| Funding                           | 4       | Sources and types of financial, material, and other support                                                                                                                                                                                                                              | <u>16</u>                |
| Roles and responsibilities        | 5a      | Names, affiliations, and roles of protocol contributors                                                                                                                                                                                                                                  | <u>1, 16</u>             |
|                                   | 5b      | Name and contact information for the trial sponsor                                                                                                                                                                                                                                       | <u>1</u>                 |
|                                   | 5c      | Role of study sponsor and funders, if any, in study design; collection, management, analysis, and interpretation of data; writing of the report; and the decision to submit the report for publication, including whether they will have ultimate authority over any of these activities | <u>13</u>                |
|                                   | 5d      | Composition, roles, and responsibilities of the coordinating centre, steering committee, endpoint adjudication committee, data management team, and other individuals or groups overseeing the trial, if applicable (see Item 21a for data monitoring committee)                         | <u>13</u>                |

|    |                                                           |     |                                                                                                                                                                                                                                                                                                                                                                                |              |
|----|-----------------------------------------------------------|-----|--------------------------------------------------------------------------------------------------------------------------------------------------------------------------------------------------------------------------------------------------------------------------------------------------------------------------------------------------------------------------------|--------------|
| 1  |                                                           |     |                                                                                                                                                                                                                                                                                                                                                                                |              |
| 2  |                                                           |     |                                                                                                                                                                                                                                                                                                                                                                                |              |
| 3  | <b>Introduction</b>                                       |     |                                                                                                                                                                                                                                                                                                                                                                                |              |
| 4  |                                                           |     |                                                                                                                                                                                                                                                                                                                                                                                |              |
| 5  | Background and rationale                                  | 6a  | Description of research question and justification for undertaking the trial, including summary of relevant studies (published and unpublished) examining benefits and harms for each intervention                                                                                                                                                                             | <u>4, 5</u>  |
| 6  |                                                           |     |                                                                                                                                                                                                                                                                                                                                                                                |              |
| 7  |                                                           |     |                                                                                                                                                                                                                                                                                                                                                                                |              |
| 8  |                                                           | 6b  | Explanation for choice of comparators                                                                                                                                                                                                                                                                                                                                          | <u>4, 5</u>  |
| 9  |                                                           |     |                                                                                                                                                                                                                                                                                                                                                                                |              |
| 10 | Objectives                                                | 7   | Specific objectives or hypotheses                                                                                                                                                                                                                                                                                                                                              | <u>5</u>     |
| 11 |                                                           |     |                                                                                                                                                                                                                                                                                                                                                                                |              |
| 12 | Trial design                                              | 8   | Description of trial design including type of trial (eg, parallel group, crossover, factorial, single group), allocation ratio, and framework (eg, superiority, equivalence, noninferiority, exploratory)                                                                                                                                                                      | <u>5, 6</u>  |
| 13 |                                                           |     |                                                                                                                                                                                                                                                                                                                                                                                |              |
| 14 |                                                           |     |                                                                                                                                                                                                                                                                                                                                                                                |              |
| 15 | <b>Methods: Participants, interventions, and outcomes</b> |     |                                                                                                                                                                                                                                                                                                                                                                                |              |
| 16 |                                                           |     |                                                                                                                                                                                                                                                                                                                                                                                |              |
| 17 | Study setting                                             | 9   | Description of study settings (eg, community clinic, academic hospital) and list of countries where data will be collected. Reference to where list of study sites can be obtained                                                                                                                                                                                             | <u>5</u>     |
| 18 |                                                           |     |                                                                                                                                                                                                                                                                                                                                                                                |              |
| 19 |                                                           |     |                                                                                                                                                                                                                                                                                                                                                                                |              |
| 20 | Eligibility criteria                                      | 10  | Inclusion and exclusion criteria for participants. If applicable, eligibility criteria for study centres and individuals who will perform the interventions (eg, surgeons, psychotherapists)                                                                                                                                                                                   | <u>6</u>     |
| 21 |                                                           |     |                                                                                                                                                                                                                                                                                                                                                                                |              |
| 22 |                                                           |     |                                                                                                                                                                                                                                                                                                                                                                                |              |
| 23 | Interventions                                             | 11a | Interventions for each group with sufficient detail to allow replication, including how and when they will be administered                                                                                                                                                                                                                                                     | <u>6</u>     |
| 24 |                                                           |     |                                                                                                                                                                                                                                                                                                                                                                                |              |
| 25 |                                                           |     |                                                                                                                                                                                                                                                                                                                                                                                |              |
| 26 |                                                           | 11b | Criteria for discontinuing or modifying allocated interventions for a given trial participant (eg, drug dose change in response to harms, participant request, or improving/worsening disease)                                                                                                                                                                                 | <u>–</u>     |
| 27 |                                                           |     |                                                                                                                                                                                                                                                                                                                                                                                |              |
| 28 |                                                           |     |                                                                                                                                                                                                                                                                                                                                                                                |              |
| 29 |                                                           | 11c | Strategies to improve adherence to intervention protocols, and any procedures for monitoring adherence (eg, drug tablet return, laboratory tests)                                                                                                                                                                                                                              | <u>5</u>     |
| 30 |                                                           |     |                                                                                                                                                                                                                                                                                                                                                                                |              |
| 31 |                                                           |     |                                                                                                                                                                                                                                                                                                                                                                                |              |
| 32 |                                                           | 11d | Relevant concomitant care and interventions that are permitted or prohibited during the trial                                                                                                                                                                                                                                                                                  | <u>7</u>     |
| 33 |                                                           |     |                                                                                                                                                                                                                                                                                                                                                                                |              |
| 34 | Outcomes                                                  | 12  | Primary, secondary, and other outcomes, including the specific measurement variable (eg, systolic blood pressure), analysis metric (eg, change from baseline, final value, time to event), method of aggregation (eg, median, proportion), and time point for each outcome. Explanation of the clinical relevance of chosen efficacy and harm outcomes is strongly recommended | <u>7</u>     |
| 35 |                                                           |     |                                                                                                                                                                                                                                                                                                                                                                                |              |
| 36 |                                                           |     |                                                                                                                                                                                                                                                                                                                                                                                |              |
| 37 |                                                           |     |                                                                                                                                                                                                                                                                                                                                                                                |              |
| 38 |                                                           |     |                                                                                                                                                                                                                                                                                                                                                                                |              |
| 39 | Participant timeline                                      | 13  | Time schedule of enrolment, interventions (including any run-ins and washouts), assessments, and visits for participants. A schematic diagram is highly recommended (see Figure)                                                                                                                                                                                               | <u>9, 10</u> |
| 40 |                                                           |     |                                                                                                                                                                                                                                                                                                                                                                                |              |
| 41 |                                                           |     |                                                                                                                                                                                                                                                                                                                                                                                |              |
| 42 |                                                           |     |                                                                                                                                                                                                                                                                                                                                                                                |              |
| 43 |                                                           |     |                                                                                                                                                                                                                                                                                                                                                                                |              |
| 44 |                                                           |     |                                                                                                                                                                                                                                                                                                                                                                                |              |
| 45 |                                                           |     |                                                                                                                                                                                                                                                                                                                                                                                |              |
| 46 |                                                           |     |                                                                                                                                                                                                                                                                                                                                                                                |              |
| 47 |                                                           |     |                                                                                                                                                                                                                                                                                                                                                                                |              |

|   |             |    |                                                                                                                                                                                       |             |
|---|-------------|----|---------------------------------------------------------------------------------------------------------------------------------------------------------------------------------------|-------------|
| 1 |             |    |                                                                                                                                                                                       |             |
| 2 |             |    |                                                                                                                                                                                       |             |
| 3 | Sample size | 14 | Estimated number of participants needed to achieve study objectives and how it was determined, including clinical and statistical assumptions supporting any sample size calculations | <u>7, 8</u> |
| 4 |             |    |                                                                                                                                                                                       |             |
| 5 | Recruitment | 15 | Strategies for achieving adequate participant enrolment to reach target sample size                                                                                                   | <u>5</u>    |
| 6 |             |    |                                                                                                                                                                                       |             |
| 7 |             |    |                                                                                                                                                                                       |             |

### 8 **Methods: Assignment of interventions (for controlled trials)**

#### 9 Allocation:

|    |                                  |     |                                                                                                                                                                                                                                                                                                                                                          |          |
|----|----------------------------------|-----|----------------------------------------------------------------------------------------------------------------------------------------------------------------------------------------------------------------------------------------------------------------------------------------------------------------------------------------------------------|----------|
| 10 |                                  |     |                                                                                                                                                                                                                                                                                                                                                          |          |
| 11 |                                  |     |                                                                                                                                                                                                                                                                                                                                                          |          |
| 12 | Sequence generation              | 16a | Method of generating the allocation sequence (eg, computer-generated random numbers), and list of any factors for stratification. To reduce predictability of a random sequence, details of any planned restriction (eg, blocking) should be provided in a separate document that is unavailable to those who enrol participants or assign interventions | <u>8</u> |
| 13 |                                  |     |                                                                                                                                                                                                                                                                                                                                                          |          |
| 14 |                                  |     |                                                                                                                                                                                                                                                                                                                                                          |          |
| 15 |                                  |     |                                                                                                                                                                                                                                                                                                                                                          |          |
| 16 |                                  |     |                                                                                                                                                                                                                                                                                                                                                          |          |
| 17 | Allocation concealment mechanism | 16b | Mechanism of implementing the allocation sequence (eg, central telephone; sequentially numbered, opaque, sealed envelopes), describing any steps to conceal the sequence until interventions are assigned                                                                                                                                                | <u>8</u> |
| 18 |                                  |     |                                                                                                                                                                                                                                                                                                                                                          |          |
| 19 |                                  |     |                                                                                                                                                                                                                                                                                                                                                          |          |
| 20 |                                  |     |                                                                                                                                                                                                                                                                                                                                                          |          |
| 21 | Implementation                   | 16c | Who will generate the allocation sequence, who will enrol participants, and who will assign participants to interventions                                                                                                                                                                                                                                | <u>8</u> |
| 22 |                                  |     |                                                                                                                                                                                                                                                                                                                                                          |          |
| 23 |                                  |     |                                                                                                                                                                                                                                                                                                                                                          |          |
| 24 | Blinding (masking)               | 17a | Who will be blinded after assignment to interventions (eg, trial participants, care providers, outcome assessors, data analysts), and how                                                                                                                                                                                                                | <u>8</u> |
| 25 |                                  |     |                                                                                                                                                                                                                                                                                                                                                          |          |
| 26 |                                  |     |                                                                                                                                                                                                                                                                                                                                                          |          |
| 27 |                                  | 17b | If blinded, circumstances under which unblinding is permissible, and procedure for revealing a participant's allocated intervention during the trial                                                                                                                                                                                                     | <u>–</u> |
| 28 |                                  |     |                                                                                                                                                                                                                                                                                                                                                          |          |
| 29 |                                  |     |                                                                                                                                                                                                                                                                                                                                                          |          |
| 30 |                                  |     |                                                                                                                                                                                                                                                                                                                                                          |          |

### 31 **Methods: Data collection, management, and analysis**

|    |                         |     |                                                                                                                                                                                                                                                                                                                                                                                                              |             |
|----|-------------------------|-----|--------------------------------------------------------------------------------------------------------------------------------------------------------------------------------------------------------------------------------------------------------------------------------------------------------------------------------------------------------------------------------------------------------------|-------------|
| 32 |                         |     |                                                                                                                                                                                                                                                                                                                                                                                                              |             |
| 33 | Data collection methods | 18a | Plans for assessment and collection of outcome, baseline, and other trial data, including any related processes to promote data quality (eg, duplicate measurements, training of assessors) and a description of study instruments (eg, questionnaires, laboratory tests) along with their reliability and validity, if known. Reference to where data collection forms can be found, if not in the protocol | <u>8–12</u> |
| 34 |                         |     |                                                                                                                                                                                                                                                                                                                                                                                                              |             |
| 35 |                         |     |                                                                                                                                                                                                                                                                                                                                                                                                              |             |
| 36 |                         |     |                                                                                                                                                                                                                                                                                                                                                                                                              |             |
| 37 |                         |     |                                                                                                                                                                                                                                                                                                                                                                                                              |             |
| 38 |                         | 18b | Plans to promote participant retention and complete follow-up, including list of any outcome data to be collected for participants who discontinue or deviate from intervention protocols                                                                                                                                                                                                                    | <u>14</u>   |
| 39 |                         |     |                                                                                                                                                                                                                                                                                                                                                                                                              |             |
| 40 |                         |     |                                                                                                                                                                                                                                                                                                                                                                                                              |             |
| 41 |                         |     |                                                                                                                                                                                                                                                                                                                                                                                                              |             |
| 42 |                         |     |                                                                                                                                                                                                                                                                                                                                                                                                              |             |
| 43 |                         |     |                                                                                                                                                                                                                                                                                                                                                                                                              |             |
| 44 |                         |     |                                                                                                                                                                                                                                                                                                                                                                                                              |             |
| 45 |                         |     |                                                                                                                                                                                                                                                                                                                                                                                                              |             |
| 46 |                         |     |                                                                                                                                                                                                                                                                                                                                                                                                              |             |
| 47 |                         |     |                                                                                                                                                                                                                                                                                                                                                                                                              |             |



1  
2  
3  
4  
5  
6  
7  
8  
9  
10  
11  
12  
13  
14  
15  
16  
17  
18  
19  
20  
21  
22  
23  
24  
25  
26  
27  
28  
29  
30  
31  
32  
33  
34  
35  
36  
37  
38  
39  
40  
41  
42  
43  
44  
45  
46  
47

|                                 |     |                                                                                                                                                                                                                                                                                                                                       |               |
|---------------------------------|-----|---------------------------------------------------------------------------------------------------------------------------------------------------------------------------------------------------------------------------------------------------------------------------------------------------------------------------------------|---------------|
| Data management                 | 19  | Plans for data entry, coding, security, and storage, including any related processes to promote data quality (eg, double data entry; range checks for data values). Reference to where details of data management procedures can be found, if not in the protocol                                                                     | <u>12</u>     |
| Statistical methods             | 20a | Statistical methods for analysing primary and secondary outcomes. Reference to where other details of the statistical analysis plan can be found, if not in the protocol                                                                                                                                                              | <u>12, 13</u> |
|                                 | 20b | Methods for any additional analyses (eg, subgroup and adjusted analyses)                                                                                                                                                                                                                                                              | <u>12</u>     |
|                                 | 20c | Definition of analysis population relating to protocol non-adherence (eg, as randomised analysis), and any statistical methods to handle missing data (eg, multiple imputation)                                                                                                                                                       | <u>12</u>     |
| <b>Methods: Monitoring</b>      |     |                                                                                                                                                                                                                                                                                                                                       |               |
| Data monitoring                 | 21a | Composition of data monitoring committee (DMC); summary of its role and reporting structure; statement of whether it is independent from the sponsor and competing interests; and reference to where further details about its charter can be found, if not in the protocol. Alternatively, an explanation of why a DMC is not needed | <u>13</u>     |
|                                 | 21b | Description of any interim analyses and stopping guidelines, including who will have access to these interim results and make the final decision to terminate the trial                                                                                                                                                               | <u>13</u>     |
| Harms                           | 22  | Plans for collecting, assessing, reporting, and managing solicited and spontaneously reported adverse events and other unintended effects of trial interventions or trial conduct                                                                                                                                                     | <u>14</u>     |
| Auditing                        | 23  | Frequency and procedures for auditing trial conduct, if any, and whether the process will be independent from investigators and the sponsor                                                                                                                                                                                           | <u>13, 14</u> |
| <b>Ethics and dissemination</b> |     |                                                                                                                                                                                                                                                                                                                                       |               |
| Research ethics approval        | 24  | Plans for seeking research ethics committee/institutional review board (REC/IRB) approval                                                                                                                                                                                                                                             | <u>14</u>     |
| Protocol amendments             | 25  | Plans for communicating important protocol modifications (eg, changes to eligibility criteria, outcomes, analyses) to relevant parties (eg, investigators, REC/IRBs, trial participants, trial registries, journals, regulators)                                                                                                      | <u>14</u>     |

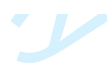

|    |                               |     |                                                                                                                                                                                                                                                                                     |               |
|----|-------------------------------|-----|-------------------------------------------------------------------------------------------------------------------------------------------------------------------------------------------------------------------------------------------------------------------------------------|---------------|
| 1  |                               |     |                                                                                                                                                                                                                                                                                     |               |
| 2  |                               |     |                                                                                                                                                                                                                                                                                     |               |
| 3  | Consent or assent             | 26a | Who will obtain informed consent or assent from potential trial participants or authorised surrogates, and how (see Item 32)                                                                                                                                                        | <u>14</u>     |
| 4  |                               |     |                                                                                                                                                                                                                                                                                     |               |
| 5  |                               |     |                                                                                                                                                                                                                                                                                     |               |
| 6  |                               | 26b | Additional consent provisions for collection and use of participant data and biological specimens in ancillary studies, if applicable                                                                                                                                               | <u>–</u>      |
| 7  |                               |     |                                                                                                                                                                                                                                                                                     |               |
| 8  | Confidentiality               | 27  | How personal information about potential and enrolled participants will be collected, shared, and maintained in order to protect confidentiality before, during, and after the trial                                                                                                | <u>12</u>     |
| 9  |                               |     |                                                                                                                                                                                                                                                                                     |               |
| 10 |                               |     |                                                                                                                                                                                                                                                                                     |               |
| 11 | Declaration of interests      | 28  | Financial and other competing interests for principal investigators for the overall trial and each study site                                                                                                                                                                       | <u>16</u>     |
| 12 |                               |     |                                                                                                                                                                                                                                                                                     |               |
| 13 |                               |     |                                                                                                                                                                                                                                                                                     |               |
| 14 | Access to data                | 29  | Statement of who will have access to the final trial dataset, and disclosure of contractual agreements that limit such access for investigators                                                                                                                                     | <u>13</u>     |
| 15 |                               |     |                                                                                                                                                                                                                                                                                     |               |
| 16 |                               |     |                                                                                                                                                                                                                                                                                     |               |
| 17 | Ancillary and post-trial care | 30  | Provisions, if any, for ancillary and post-trial care, and for compensation to those who suffer harm from trial participation                                                                                                                                                       | <u>–</u>      |
| 18 |                               |     |                                                                                                                                                                                                                                                                                     |               |
| 19 |                               |     |                                                                                                                                                                                                                                                                                     |               |
| 20 | Dissemination policy          | 31a | Plans for investigators and sponsor to communicate trial results to participants, healthcare professionals, the public, and other relevant groups (eg, via publication, reporting in results databases, or other data sharing arrangements), including any publication restrictions | <u>14, 15</u> |
| 21 |                               |     |                                                                                                                                                                                                                                                                                     |               |
| 22 |                               |     |                                                                                                                                                                                                                                                                                     |               |
| 23 |                               |     |                                                                                                                                                                                                                                                                                     |               |
| 24 |                               |     |                                                                                                                                                                                                                                                                                     |               |
| 25 |                               | 31b | Authorship eligibility guidelines and any intended use of professional writers                                                                                                                                                                                                      | <u>16</u>     |
| 26 |                               |     |                                                                                                                                                                                                                                                                                     |               |
| 27 |                               | 31c | Plans, if any, for granting public access to the full protocol, participant-level dataset, and statistical code                                                                                                                                                                     | <u>–</u>      |
| 28 |                               |     |                                                                                                                                                                                                                                                                                     |               |
| 29 | <b>Appendices</b>             |     |                                                                                                                                                                                                                                                                                     |               |
| 30 |                               |     |                                                                                                                                                                                                                                                                                     |               |
| 31 | Informed consent materials    | 32  | Model consent form and other related documentation given to participants and authorised surrogates                                                                                                                                                                                  | <u>–</u>      |
| 32 |                               |     |                                                                                                                                                                                                                                                                                     |               |
| 33 |                               |     |                                                                                                                                                                                                                                                                                     |               |
| 34 | Biological specimens          | 33  | Plans for collection, laboratory evaluation, and storage of biological specimens for genetic or molecular analysis in the current trial and for future use in ancillary studies, if applicable                                                                                      | <u>–</u>      |
| 35 |                               |     |                                                                                                                                                                                                                                                                                     |               |
| 36 |                               |     |                                                                                                                                                                                                                                                                                     |               |

37 \*It is strongly recommended that this checklist be read in conjunction with the SPIRIT 2013 Explanation & Elaboration for important clarification on the items.  
 38 Amendments to the protocol should be tracked and dated. The SPIRIT checklist is copyrighted by the SPIRIT Group under the Creative Commons  
 39 "[Attribution-NonCommercial-NoDerivs 3.0 Unported](https://creativecommons.org/licenses/by-nc-nd/3.0/)" license.  
 40
